# Supplementary material
Source: publisher figshare collection journal article supplement (https://tandf.figshare.com/articles/dataset/_/10265120)
Supplement: Supplementary file 1 [file 1]

Supplementary Table 2: Pathway analyses for AD- and tau-related proteins. For each pathway, enrichment in different groups of proteins are indicated (i.e., AD, all studies; AD, clinical; AD, biomarker; t-tau), as well as the overlap between the input and pathway proteins.

| Pathway                                                                                                                     |             | AD, total |                                           |               | AD, clinical |                         |               | AD, biomarker |                     |               | t-tau   |                           |               |
|-----------------------------------------------------------------------------------------------------------------------------|-------------|-----------|-------------------------------------------|---------------|--------------|-------------------------|---------------|---------------|---------------------|---------------|---------|---------------------------|---------------|
| Pathway name                                                                                                                | Total genes | overlap   | Genes in overlap                          | FDR (p value) | overlap      | Genes in overlap        | FDR (p value) | overlap       | Genes in overlap    | FDR (p value) | overlap | Genes in overlap          | FDR (p value) |
| Platelet activation, signaling and aggregation                                                                              | 262         | 8         | [APOH COL1A2 HRG AHSG YWHAZ FGB IGF2 A2M] | 0.00078***    | 4            | [ALB HRG AHSG A2M]      | 0.013*        | 4             | [APOH FGB IGF2 CLU] | 0.013*        | 4       | [HGF VEGFA SERPINE1 SOD1] | 0.016*        |
| Platelet degranulation                                                                                                      | 128         | 6         | [APOH HRG AHSG FGB IGF2 A2M]              | 0.00078***    | 4            | [ALB HRG AHSG A2M]      | 0.002**       | 4             | [APOH FGB IGF2 CLU] | 0.0016**      | 4       | [HGF VEGFA SERPINE1 SOD1] | 0.0033**      |
| Response to elevated platelet cytosolic Ca2+                                                                                | 133         | 6         | [APOH HRG AHSG FGB IGF2 A2M]              | 0.00078***    | 4            | [ALB HRG AHSG A2M]      | 0.002**       | 4             | [APOH FGB IGF2 CLU] | 0.0016**      | 4       | [HGF VEGFA SERPINE1 SOD1] | 0.0033**      |
| Plasma lipoprotein assembly                                                                                                 | 19          | 3         | [APOC2 APOA2 A2M]                         | 0.0028**      | 2            | [APOE A2M]              | 0.0076        | -             | -                   | -             | 1       | [APOE]                    | 0.042         |
| Regulation of Insulin-like Growth Factor (IGF) transport and uptake by Insulin-like Growth Factor Binding Proteins (IGFBPs) | 124         | 5         | [IGFBP5 AHSG IGF2 C3 APOA2]               | 0.0045**      | 5            | [CHGB APOE ALB AHSG C3] | 0.00011***    | 4             | [VGF SCG2 IGF2 C3]  | 0.0016**      | 2       | [APOE SPP1]               | 0.042         |
| Retinoid metabolism and transport                                                                                           | 44          | 3         | [RBP1 APOC2 APOA2]                        | 0.015*        | 1            | [APOE]                  | 0.076         | 1             | [TTR]               | 0.075         | 1       | [APOE]                    | 0.094         |
| Post-translational protein phosphorylation                                                                                  | 107         | 4         | [IGFBP5 AHSG C3 APOA2]                    | 0.015*        | 5            | [CHGB APOE ALB AHSG C3] | 0.00011***    | 3             | [VGF SCG2 C3]       | 0.013*        | 2       | [APOE SPP1]               | 0.042         |
| Metabolism of fat-soluble vitamins                                                                                          | 48          | 3         | [RBP1 APOC2 APOA2]                        | 0.015*        | 1            | [APOE]                  | 0.083         | 1             | [TTR]               | 0.075         | 1       | [APOE]                    | 0.1           |
| Extracellular matrix organization                                                                                           | 301         | 6         | [NCAM1 LTBP2 COL1A2 NRXN1 FGB A2M]        | 0.015*        | 1            | [A2M]                   | 0.42          | 3             | [NRXN1 TTR FGB]     | 0.064         | 2       | [SERPINE1 SPP1]           | 0.15          |
| Plasma lipoprotein assembly, remodeling, and clearance                                                                      | 72          | 3         | [APOC2 APOA2 A2M]                         | 0.038*        | 3            | [APOE ALB A2M]          | 0.0045**      | -             | -                   | -             | 1       | [APOE]                    | 0.15          |
| Binding and Uptake of Ligands by Scavenger Receptors                                                                        | 129         | 2         | [HP COL1A2]                               | 0.15          | 3            | [HP APOE ALB]           | 0.014*        | -             | -                   | -             | 2       | [APOE FTH1]               | 0.042         |

|                                                                                |      |   |                                                    |       |   |                              |        |   |                          |       |   |                                                          |          |
|--------------------------------------------------------------------------------|------|---|----------------------------------------------------|-------|---|------------------------------|--------|---|--------------------------|-------|---|----------------------------------------------------------|----------|
| Transport of small molecules                                                   | 731  | 5 | [APOC2<br>ATP6AP1 AZGP1<br>APOA2 A2M]              | 0.15  | 5 | [APOD APOE<br>ALB AZGP1 A2M] | 0.048* | - | -                        | -     | 2 | [APOE FTH1]                                              | 0.49     |
| Neutrophil de-granulation                                                      | 480  | 5 | [HP CHI3L1<br>NFASC AHSG C3]                       | 0.15  | 4 | [HP CHI3L1<br>AHSG C3]       | 0.048* | 4 | [CHI3L1 NFASC<br>TTR C3] | 0.064 | 3 | [CHI3L1<br>MIF FTH1]                                     | 0.091    |
| Constitutive Signaling by Aberrant PI3K in Cancer                              | 86   | - | -                                                  | -     | - | -                            | -      | - | -                        | -     | 4 | [HGF KITLG<br>HBEGF TGFA]                                | 0.0033** |
| PI3K/AKT Signaling in Cancer                                                   | 113  | - | -                                                  | -     | - | -                            | -      | - | -                        | -     | 4 | [HGF KITLG<br>HBEGF TGFA]                                | 0.0033** |
| Diseases of signal transduction                                                | 403  | 2 | [RBP1 FGB]                                         | 0.46  | - | -                            | -      | 2 | [TTR FGB]                | 0.14  | 4 | [HGF KITLG<br>HBEGF TGFA]                                | 0.035*   |
| Transcriptional regulation by the AP-2 (TFAP2) family of transcription factors | 37   | - | -                                                  | -     | 1 | [APOE]                       | 0.066  | - | -                        | -     | 3 | [VEGFA<br>APOE TGFA]                                     | 0.0033** |
| Generic Transcription Pathway                                                  | 1233 | 1 | [YWHAZ]                                            | 0.99  | 1 | [APOE]                       | 0.9    | - | -                        | -     | 7 | [VEGFA APOE<br>SERPINE1<br>TGFA SPP1 TN-<br>FRSF10C FAS] | 0.042*   |
| RNA Polymerase II Transcription                                                | 1355 | 1 | [YWHAZ]                                            | 1     | 1 | [APOE]                       | 0.93   | - | -                        | -     | 7 | [VEGFA APOE<br>SERPINE1<br>TGFA SPP1 TN-<br>FRSF10C FAS] | 0.042*   |
| Gene expression (Transcription)                                                | 1497 | 1 | [YWHAZ]                                            | 1     | 1 | [APOE]                       | 0.94   | - | -                        | -     | 7 | [VEGFA APOE<br>SERPINE1<br>TGFA SPP1 TN-<br>FRSF10C FAS] | 0.042*   |
| Hemostasis                                                                     | 722  | 8 | [APOH COL1A2<br>HRG AHSG<br>YWHAZ FGB<br>IGF2 A2M] | 0.075 | 4 | [ALB HRG<br>AHSG A2M]        | 0.066  | 4 | [APOH FGB<br>IGF2 CLU]   | 0.073 | 7 | [HGF VEGFA<br>MIF ANGPT2 F3<br>SERPINE1 SOD1]            | 0.0073** |
| Signaling by Interleukins                                                      | 639  | 5 | [NCAM1 IGHG1<br>COL1A2 YW-<br>HAZ FGB]             | 0.15  | - | -                            | -      | 1 | [FGB]                    | 0.65  | 7 | [HGF VEGFA MIF<br>KITLG HBEGF<br>TGFA SOD1]              | 0.0048** |
| Cytokine Signaling in Immune system                                            | 953  | 5 | [NCAM1 IGHG1<br>COL1A2 YW-<br>HAZ FGB]             | 0.3   | - | -                            | -      | 1 | [FGB]                    | 0.8   | 8 | [HGF VEGFA<br>MIF CD40<br>KITLG HBEGF<br>TGFA SOD1]      | 0.0073** |
| FLT3 Signaling                                                                 | 277  | 2 | [NCAM1 FGB]                                        | 0.29  | - | -                            | -      | 1 | [FGB]                    | 0.36  | 4 | [HGF KITLG<br>HBEGF TGFA]                                | 0.016*   |

|                                                 |      |    |                                                                    |      |   |                               |      |   |                               |      |    |                                                                  |          |
|-------------------------------------------------|------|----|--------------------------------------------------------------------|------|---|-------------------------------|------|---|-------------------------------|------|----|------------------------------------------------------------------|----------|
| Other inter-leukin signaling                    | 300  | 2  | [NCAM1 FGB]                                                        | 0.32 | - | -                             | -    | 1 | [FGB]                         | 0.39 | 4  | [HGF KITLG HBEGF TGFA]                                           | 0.021*   |
| Immune System                                   | 2370 | 11 | [HP TREM2 CHI3L1 NCAM1 NFASC IGHG1 COL1A2 AHSG YWHAZ FGB C3]       | 0.3  | 5 | [HP CHGA CMGA CHI3L1 AHSG C3] | 0.43 | 6 | [CHI3L1 NFASC TTR FGB C3 CLU] | 0.17 | 11 | [HGF VEGFA CHGA CMGA CHI3L1 MIF CD40 KITLG HBEGF TGFA FTH1 SOD1] | 0.033*   |
| Signaling by Receptor Tyrosine Kinases          | 487  | 3  | [COL1A2 ATP6AP1 IGF2]                                              | 0.29 | 1 | [APOE]                        | 0.59 | 1 | [IGF2]                        | 0.55 | 8  | [HGF VEGFA APOE KITLG HBEGF TGFA SPP1]                           | 0.0013** |
| PI5P, PP2A and IER3 Regulate PI3K/AKT Signaling | 115  | -  | -                                                                  | -    | - | -                             | -    | - | -                             | -    | 4  | [HGF KITLG HBEGF TGFA]                                           | 0.0033** |
| Negative regulation of the PI3K/AKT network     | 122  | -  | -                                                                  | -    | - | -                             | -    | - | -                             | -    | 4  | [HGF KITLG HBEGF TGFA]                                           | 0.0033** |
| MAPK1/MAPK3 signaling                           | 266  | 2  | [NCAM1 FGB]                                                        | 0.27 | - | -                             | -    | 1 | [FGB]                         | 0.35 | 4  | [HGF KITLG HBEGF TGFA]                                           | 0.016*   |
| PIP3 activates AKT signaling                    | 275  | -  | -                                                                  | -    | - | -                             | -    | - | -                             | -    | 4  | [HGF KITLG HBEGF TGFA]                                           | 0.016*   |
| MAPK family signaling cascades                  | 305  | 2  | [NCAM1 FGB]                                                        | 0.33 | - | -                             | -    | 1 | [FGB]                         | 0.39 | 4  | [HGF KITLG HBEGF TGFA]                                           | 0.022*   |
| Intracellular signaling by second messengers    | 314  | -  | -                                                                  | -    | - | -                             | -    | - | -                             | -    | 4  | [HGF KITLG HBEGF TGFA]                                           | 0.023*   |
| Signal Transduction                             | 2768 | 12 | [NCAM1 COL1A2 RBP1 APOC2 ATP6AP1 YWHAZ FGB IGF2 C3 APOA2 A2M TAC1] | 0.37 | 4 | [APOE AGT C3 A2M]             | 0.77 | 5 | [TTR FGB IGF2 C3 TAC1]        | 0.47 | 11 | [HGF VEGFA APOE KITLG SERPINE1 HBEGF TGFA SPP1 PPY FAS]          | 0.042*   |
| RAF/MAP kinase cascade                          | 259  | 2  | [NCAM1 FGB]                                                        | 0.26 | - | -                             | -    | 1 | [FGB]                         | 0.34 | 4  | [HGF KITLG HBEGF TGFA]                                           | 0.016*   |
| Vesicle-mediated transport                      | 761  | 3  | [HP COL1A2 YWHAZ]                                                  | 0.57 | 3 | [HP APOE ALB]                 | 0.15 | - | -                             | -    | 5  | [SORT1 APOE HBEGF TGFA FTH1]                                     | 0.042*   |

\*, FDR p value < 0.05; \*\*, FDR p value < 0.01; \*\*\*, FDR p value < 0.001; -, no overlap between input and pathway proteins. Pathways are only considered to be significantly enriched if the overlap between input and pathway genes is at least 3.
