# Supplementary material
Source: publisher figshare collection journal article supplement (https://tandf.figshare.com/articles/dataset/_/10265120)
Supplement: Supplementary file 2 [file 1]

Supplement 1: CSF proteins from included studies. For each protein, it is shown whether protein levels differed significantly for different comparisons (AD or MCI vs. controls) or correlated with levels of CSF amyloid, t-tau and p-tau. In addition, for each protein the direction of the change (i.e., increased or decreased levels) and the consistency of the protein level increases or decreases across studies is indicated.

| Gene     | UniProt | AD, All studies |             | AD, Clinical |                                     | AD, Biomarker |             | MCI       |                            | t-tau       |             | p-tau     |                | amyloid     |             |
|----------|---------|-----------------|-------------|--------------|-------------------------------------|---------------|-------------|-----------|----------------------------|-------------|-------------|-----------|----------------|-------------|-------------|
|          |         | In analysis     | Consistent? | Direction    | No. of studies                      | In analysis   | Consistent? | Direction | No. of studies             | In analysis | Consistent? | Direction | No. of studies | In analysis | Consistent? |
| TTR      | P02766  | ✓               | ×           | ↕            | 9                                   | ✓             | ×           | ↕         | 7                          | ✓           | ✓           | ↑         | 2              | ✓           | ✓           |
|          |         |                 |             |              | [2 5 17<br>18 21 22<br>26 27<br>28] |               |             |           | [2 5 17<br>22 26<br>27 28] |             |             |           |                |             |             |
| VGF      | O15240  | ✓               | ×           | ↕            | 8                                   | ✓             | ×           | ↕         | 3                          | ✓           | ✓           | ↓         | 5              | ×           | ×           |
|          |         |                 |             |              | [2 6 7 11<br>14 23 25<br>29]        |               |             |           | [2 7 25]                   |             |             |           |                |             |             |
| APOE     | P02649  | ✓               | ×           | ↕            | 8                                   | ✓             | ✓           | ↓         | 3                          | ✓           | ×           | ↕         | 5              | ✓           | ×           |
|          |         |                 |             |              | [2 8 11<br>18 21 22<br>24 27]       |               |             |           | [2 22<br>27]               |             |             |           |                |             |             |
| CHGA     | P10645  | ✓               | ×           | ↕            | 7                                   | ✓             | ✓           | ↓         | 3                          | ✓           | ×           | ↕         | 4              | ✓           | ×           |
|          |         |                 |             |              | [2 7 10<br>11 23 24<br>25]          |               |             |           | [2 7 25]                   |             |             |           |                |             |             |
| SERPINA1 | P01009  | ✓               | ×           | ↕            | 7                                   | ✓             | ×           | ↕         | 6                          | ✓           | ×           | ↑         | 1              | ×           | ×           |
|          |         |                 |             |              | [3 5 15<br>18 20 26<br>28]          |               |             |           | [3 5 15<br>20 26<br>28]    |             |             |           |                |             |             |
| CST3     | P01034  | ✓               | ×           | ↕            | 6                                   | ✓             | ×           | ↕         | 3                          | ✓           | ×           | ↕         | 3              | ✓           | ×           |
|          |         |                 |             |              | [2 3 7 8<br>21 23]                  |               |             |           | [2 3 7]                    |             |             |           |                |             |             |
| CHI3L1   | P36222  | ✓               | ✓           | ↑            | 6                                   | ✓             | ✓           | ↑         | 2                          | ✓           | ✓           | ↑         | 4              | ×           | ×           |
|          |         |                 |             |              | [2 6 8 12<br>17 21]                 |               |             |           | [2 17]                     |             |             |           |                |             |             |
| CLU      | P10909  | ✓               | ×           | ↕            | 6                                   | ✓             | ×           | ↕         | 3                          | ✓           | ✓           | ↑         | 3              | ×           | ×           |
|          |         |                 |             |              | [2 11 18<br>20 21<br>28]            |               |             |           | [2 20<br>28]               |             |             |           |                |             |             |
| SPP1     | P10451  | ✓               | ×           | ↕            | 6                                   | ✓             | ×           | ↕         | 3                          | ✓           | ×           | ↑         | 1              | ×           | ×           |
|          |         |                 |             |              | [3 7 8 20<br>21 29]                 |               |             |           | [3 7 20]                   |             |             |           |                |             |             |
| NPTXR    | O95502  | ✓               | ×           | ↕            | 6                                   | ✓             | ×           | ↕         | 3                          | ✓           | ×           | ↑         | 1              | ×           | ×           |
|          |         |                 |             |              | [5 14 18<br>20 24<br>28]            |               |             |           | [5 20<br>28]               |             |             |           |                |             |             |
| APOD     | P05090  | ✓               | ×           | ↕            | 5                                   | ✓             | ✓           | ↑         | 2                          | ✓           | ×           | ↕         | 3              | ×           | ×           |
|          |         |                 |             |              | [3 10 19<br>20 24]                  |               |             |           | [3 20]                     |             |             |           |                |             |             |
| PCSK1N   | Q9UHG2  | ✓               | ×           | ↕            | 5                                   | ✓             | ✓           | ↓         | 2                          | ✓           | ×           | ↕         | 3              | ×           | ×           |
|          |         |                 |             |              | [5 11 18<br>24 25]                  |               |             |           | [5 25]                     |             |             |           |                |             |             |
| NPTX1    | Q15818  | ✓               | ×           | ↕            | 5                                   | ✓             | ×           | ↕         | 3                          | ✓           | ✓           | ↓         | 2              | ×           | ×           |
|          |         |                 |             |              | [15 20<br>23 24<br>27]              |               |             |           | [15 20<br>27]              |             |             |           |                |             |             |
| FABP3    | P05413  | ✓               | ✓           | ↑            | 4                                   | ✓             | ✓           | ↑         | 3                          | ✓           | ×           | ↑         | 1              | ✓           | ×           |
|          |         |                 |             |              | [3 5 12<br>20]                      |               |             |           | [3 5 20]                   |             |             |           |                |             |             |
| SCG2     | P13521  | ✓               | ×           | ↕            | 4                                   | ✓             | ×           | ↕         | 2                          | ✓           | ✓           | ↓         | 2              | ×           | ×           |
|          |         |                 |             |              | [2 23 25<br>29]                     |               |             |           | [2 25]                     |             |             |           |                |             |             |
| PSAP     | P07602  | ✓               | ×           | ↕            | 4                                   | ✓             | ×           | ↕         | 3                          | ✓           | ×           | ↑         | 1              | ×           | ×           |
|          |         |                 |             |              | [2 7 15<br>21]                      |               |             |           | [2 7 15]                   |             |             |           |                |             |             |

|            |        |         |               |         |            |         |         |         |         |          |         |         |         |     |   |
|------------|--------|---------|---------------|---------|------------|---------|---------|---------|---------|----------|---------|---------|---------|-----|---|
| AGT        | P01019 | ✓ × ⇕ 4 | [2 15 24 28]  | ✓ ✓ ↑ 3 | [2 15 28]  | ✓ × ↓ 1 | [24]    | × - -   | ×       | -        | ×       | -       | ×       | -   |   |
| CHGB       | P05060 | ✓ × ⇕ 4 | [2 11 24 25]  | ✓ ✓ ↓ 2 | [2 25]     | ✓ × ⇕ 2 | [11 24] | × - -   | ×       | -        | ×       | -       | ×       | -   |   |
| GSN        | P06396 | ✓ × ⇕ 4 | [2 20 28 29]  | ✓ × ⇕ 3 | [2 20 28]  | ✓ × ↑ 1 | [29]    | × - -   | ×       | -        | ×       | -       | ×       | -   |   |
| CNDP1      | Q96KN2 | ✓ × ⇕ 4 | [2 6 15 21]   | ✓ × ⇕ 2 | [2 15]     | ✓ × ⇕ 2 | [6 21]  | × - -   | ×       | -        | ✓ × ↑ 1 | [8]     | ×       | -   |   |
| SORT1      | Q99523 | ✓ × ⇕ 4 | [3 20 24 25]  | ✓ × ⇕ 3 | [3 20 25]  | ✓ × ↑ 1 | [24]    | × - -   | ✓ ✓ ↑ 3 | [3 4 10] | ✓ × ↑ 1 | [3]     | ✓ × ↑ 1 | [3] |   |
| B2M        | P61769 | ✓ × ⇕ 4 | [7 22 26 29]  | ✓ × ⇕ 3 | [7 22 26]  | ✓ × ↑ 1 | [29]    | ✓ × ↑ 1 | [9]     | ✓ × ⇕ 2  | [4 10]  | ✓ × ↓ 1 | [4]     | ×   | - |
| C3         | P01024 | ✓ ✓ ↑ 4 | [7 10 17 18]  | ✓ ✓ ↑ 2 | [7 17]     | ✓ ✓ ↑ 2 | [10 18] | ✓ ✓ ↑ 2 | [5 9]   | ×        | -       | ×       | -       | ×   | - |
| ITM2B      | Q9Y287 | ✓ × ⇕ 4 | [7 20 24 25]  | ✓ × ⇕ 3 | [7 20 25]  | ✓ × ↑ 1 | [24]    | × - -   | ×       | -        | ×       | -       | ×       | -   |   |
| SOD1       | P00441 | ✓ × ⇕ 4 | [20 24 25 28] | ✓ × ⇕ 3 | [20 25 28] | ✓ × ↓ 1 | [24]    | × - -   | ✓ ✓ ↑ 2 | [10 12]  | ✓ × ↑ 1 | [12]    | ×       | -   |   |
| SCG3       | Q8WXD2 | ✓ × ⇕ 3 | [2 24 25]     | ✓ × ⇕ 2 | [2 25]     | ✓ × ↓ 1 | [24]    | × - -   | ×       | -        | ×       | -       | ×       | -   |   |
| A2M        | P01023 | ✓ ✓ ↑ 3 | [2 10 15]     | ✓ ✓ ↑ 2 | [2 15]     | ✓ × ↑ 1 | [10]    | × - -   | ×       | -        | ×       | -       | ×       | -   |   |
| APOH       | P02749 | ✓ ✓ ↑ 3 | [2 21 24]     | ✓ × ↑ 1 | [2]        | ✓ ✓ ↑ 2 | [21 24] | × - -   | ×       | -        | ×       | -       | ×       | -   |   |
| APOA1      | P02647 | ✓ × ⇕ 3 | [2 6 22]      | ✓ × ⇕ 2 | [2 22]     | ✓ × ↑ 1 | [6]     | × - -   | ×       | -        | ×       | -       | ×       | -   |   |
| NRCAM      | Q92823 | ✓ × ⇕ 3 | [2 10 27]     | ✓ ✓ ↓ 2 | [2 27]     | ✓ × ↑ 1 | [10]    | ✓ × ↓ 1 | [27]    | ✓ × ↑ 1  | [17]    | ✓ × ↑ 1 | [17]    | ×   | - |
| TNFRSF-10C | O14798 | ✓ × ⇕ 3 | [3 10 29]     | ✓ × ↑ 1 | [3]        | ✓ × ⇕ 2 | [10 29] | ✓ × ↓ 1 | [13]    | ✓ ✓ ↑ 2  | [3 10]  | ✓ ✓ ↑ 2 | [3 4]   | ×   | - |
| IGFBP2     | P18065 | ✓ × ⇕ 3 | [3 15 21]     | ✓ × ⇕ 2 | [3 15]     | ✓ × ↑ 1 | [21]    | × - -   | ✓ × ↑ 1 | [3]      | ✓ × ⇕ 2 | [3 4]   | ×       | -   |   |
| MCAM       | P43121 | ✓ × ⇕ 3 | [5 20 27]     | ✓ × ⇕ 3 | [5 20 27]  | ×       | -       | ✓ × ↓ 1 | [27]    | ×        | -       | ×       | -       | ×   | - |
| APP        | P05067 | ✓ × ⇕ 3 | [7 11 25]     | ✓ × ⇕ 2 | [7 25]     | ✓ × ↑ 1 | [11]    | × - -   | ×       | -        | ×       | -       | ×       | -   |   |
| HP         | P00738 | ✓ ✓ ↑ 3 | [15 20 24]    | ✓ ✓ ↑ 2 | [15 20]    | ✓ × ↑ 1 | [24]    | × - -   | ×       | -        | ×       | -       | ×       | -   |   |
| DAG1       | Q14118 | ✓ × ⇕ 3 | [15 28 29]    | ✓ × ⇕ 2 | [15 28]    | ✓ × ↑ 1 | [29]    | × - -   | ×       | -        | ×       | -       | ×       | -   |   |
| CLEC3B     | P05452 | ✓ × ⇕ 3 | [15 24 28]    | ✓ × ⇕ 2 | [15 28]    | ✓ × ↓ 1 | [24]    | × - -   | ×       | -        | ×       | -       | ×       | -   |   |
| CFD        | P00746 | ✓ × ⇕ 3 | [15 29 20]    | ✓ × ⇕ 2 | [15 20]    | ✓ × ↑ 1 | [29]    | × - -   | ×       | -        | ×       | -       | ×       | -   |   |
| GC         | P02774 | ✓ × ⇕ 3 | [15 21 18]    | ✓ × ↓ 1 | [15]       | ✓ ✓ ↑ 2 | [18 21] | × - -   | ×       | -        | ×       | -       | ×       | -   |   |
| CHL1       | O00533 | ✓ ✓ ↓ 3 | [15 27 20]    | ✓ ✓ ↓ 3 | [15 27 20] | ×       | -       | ✓ × ↓ 1 | [27]    | ×        | -       | ×       | -       | ×   | - |
| ALB        | P02768 | ✓ × ⇕ 3 | [18 26 25]    | ✓ ✓ ↓ 2 | [25 26]    | ✓ × ↑ 1 | [18]    | × - -   | ×       | -        | ×       | -       | ×       | -   |   |

|          |                   |   |   |   |   |         |    |   |   |   |   |        |   |   |   |   |         |   |   |   |   |     |   |   |        |   |   |   |   |        |   |   |   |   |       |
|----------|-------------------|---|---|---|---|---------|----|---|---|---|---|--------|---|---|---|---|---------|---|---|---|---|-----|---|---|--------|---|---|---|---|--------|---|---|---|---|-------|
| NFASC    | O94856            | ✓ | ✓ | ↓ | 3 | [20 24] | 23 | ✓ | × | ↓ | 1 | [20]   | ✓ | ✓ | ↓ | 2 | [23 24] | × | - | - | × | -   | × | - | ×      | - |   |   |   |        |   |   |   |   |       |
| NRXN1    | P58400#<br>Q9ULB1 | ✓ | ✓ | ↓ | 3 | [23 25] | 24 | ✓ | × | ↓ | 1 | [25]   | ✓ | ✓ | ↓ | 2 | [23 24] | × | - | - | × | -   | × | - | ×      | - |   |   |   |        |   |   |   |   |       |
| MT3      | P25713            | ✓ | × | ⇅ | 3 | [24 29] | 25 | ✓ | × | ↓ | 1 | [25]   | ✓ | × | ⇅ | 2 | [24 29] | × | - | - | × | -   | × | - | ×      | - |   |   |   |        |   |   |   |   |       |
| VEGFA    | P15692            | ✓ | × | ⇅ | 2 | [3 10]  |    | ✓ | × | ↓ | 1 | [3]    | ✓ | × | ↑ | 1 | [10]    | × | - | - | ✓ | ✓   | ↑ | 2 | [3 4]  | ✓ | ✓ | ↑ | 2 | [3 4]  | ✓ | × | ⇅ | 2 | [1 3] |
| SERPINA3 | P01011            | ✓ | × | ⇅ | 2 | [2 7]   |    | ✓ | × | ⇅ | 2 | [2 7]  | × |   | - |   |         | × | - | - | × | -   | × | - | ×      | - |   |   |   |        |   |   |   |   |       |
| CUTA     | O60888            | ✓ | ✓ | ↓ | 2 | [2 24]  |    | ✓ | × | ↓ | 1 | [2]    | ✓ | × | ↓ | 1 | [24]    | × | - | - | × | -   | × | - | ×      | - |   |   |   |        |   |   |   |   |       |
| CP       | P00450            | ✓ | × | ⇅ | 2 | [2 28]  |    | ✓ | × | ⇅ | 2 | [2 28] | × |   | - |   |         | × | - | - | × | -   | × | - | ×      | - |   |   |   |        |   |   |   |   |       |
| CLSTN1   | O94985            | ✓ | ✓ | ↓ | 2 | [2 25]  |    | ✓ | ✓ | ↓ | 2 | [2 25] | × |   | - |   |         | × | - | - | × | -   | × | - | ×      | - |   |   |   |        |   |   |   |   |       |
| PTGDS    | P41222            | ✓ | ✓ | ↓ | 2 | [2 25]  |    | ✓ | ✓ | ↓ | 2 | [2 25] | × |   | - |   |         | × | - | - | × | -   | × | - | ×      | - |   |   |   |        |   |   |   |   |       |
| APOC2    | P02655            | ✓ | ✓ | ↓ | 2 | [2 29]  |    | ✓ | × | ↓ | 1 | [2]    | ✓ | × | ↓ | 1 | [29]    | × | - | - | × | -   | × | - | ×      | - |   |   |   |        |   |   |   |   |       |
| CPE      | P16870            | ✓ | × | ⇅ | 2 | [2 21]  |    | ✓ | × | ↓ | 1 | [2]    | ✓ | × | ↑ | 1 | [21]    | × | - | - | × | -   | × | - | ×      | - |   |   |   |        |   |   |   |   |       |
| GOT1     | P17174            | ✓ | ✓ | ↓ | 2 | [2 20]  |    | ✓ | ✓ | ↓ | 2 | [2 20] | × |   | - |   |         | × | - | - | ✓ | ×   | ↑ | 1 | [12]   | ✓ | × | ↑ | 1 | [12]   | × | - |   |   |       |
| CCL26    | Q9Y258            | ✓ | ✓ | ↑ | 2 | [3 10]  |    | ✓ | × | ↑ | 1 | [3]    | ✓ | × | ↑ | 1 | [10]    | × | - | - | ✓ | ✓   | ↑ | 2 | [3 10] | ✓ | × | ↑ | 1 | [3]    | × | - |   |   |       |
| IL7      | P13232            | ✓ | × | ⇅ | 2 | [3 10]  |    | ✓ | × | ↓ | 1 | [3]    | ✓ | × | ↑ | 1 | [10]    | × | - | - | × | -   | × | - |        | ✓ | × | ↑ | 1 | [3]    |   |   |   |   |       |
| INS      | P01308            | ✓ | × | ⇅ | 2 | [3 15]  |    | ✓ | × | ⇅ | 2 | [3 15] | × |   | - |   |         | × | - | - | ✓ | ×   | ↑ | 1 | [3]    | ✓ | × | ↑ | 1 | [3]    | ✓ | × | ↑ | 1 | [3]   |
| NPTX2    | P47972            | ✓ | ✓ | ↓ | 2 | [5 29]  |    | ✓ | × | ↓ | 1 | [5]    | ✓ | × | ↓ | 1 | [29]    | × | - | - | × | -   | × | - |        | ✓ | × | ↑ | 1 | [12]   |   |   |   |   |       |
| AFM      | P43652            | ✓ | ✓ | ↑ | 2 | [6 15]  |    | ✓ | × | ↑ | 1 | [15]   | ✓ | × | ↑ | 1 | [6]     | × | - | - | × | -   | × | - |        | × | - |   |   |        |   |   |   |   |       |
| SPARC    | P09486            | ✓ | × | ⇅ | 2 | [6 15]  |    | ✓ | × | ↓ | 1 | [15]   | ✓ | × | ↑ | 1 | [6]     | ✓ | × | ↑ | 1 | [6] | × | - |        | × | - |   |   |        |   |   |   |   |       |
| MDH1     | P40925            | ✓ | ✓ | ↑ | 2 | [8 21]  |    | × |   | - |   |        | ✓ | ✓ | ↑ | 2 | [8 21]  | × | - | - | ✓ | ✓   | ↑ | 2 | [8 12] | ✓ | ✓ | ↑ | 2 | [8 12] | × | - |   |   |       |
| TIMP1    | P01033            | ✓ | × | ⇅ | 2 | [15 21] |    | ✓ | × | ↓ | 1 | [15]   | ✓ | × | ↑ | 1 | [21]    | × | - | - | ✓ | ×   | ↑ | 1 | [10]   | × | - | × | - |        |   |   |   |   |       |
| APLP1    | P51693            | ✓ | × | ⇅ | 2 | [11 25] |    | ✓ | × | ↓ | 1 | [25]   | ✓ | × | ↑ | 1 | [11]    | × | - | - | × | -   | × | - |        | × | - |   |   |        |   |   |   |   |       |
| SCG5     | P05408            | ✓ | ✓ | ↑ | 2 | [11 15] |    | ✓ | × | ↑ | 1 | [15]   | ✓ | × | ↑ | 1 | [11]    | × | - | - | × | -   | × | - |        | × | - |   |   |        |   |   |   |   |       |
| YWHAZ    | P63104            | ✓ | ✓ | ↑ | 2 | [12 20] |    | ✓ | × | ↑ | 1 | [20]   | ✓ | × | ↑ | 1 | [12]    | × | - | - | ✓ | ×   | ↑ | 1 | [12]   | ✓ | × | ↑ | 1 | [12]   | × | - |   |   |       |
| SMOC1    | Q9H4F8            | ✓ | ✓ | ↑ | 2 | [12 20] |    | ✓ | × | ↑ | 1 | [20]   | ✓ | × | ↑ | 1 | [12]    | × | - | - | ✓ | ×   | ↑ | 1 | [12]   | ✓ | × | ↑ | 1 | [12]   | × | - |   |   |       |
| SPON1    | Q9HCB6            | ✓ | ✓ | ↑ | 2 | [15 24] |    | ✓ | × | ↑ | 1 | [15]   | ✓ | × | ↑ | 1 | [24]    | × | - | - | ✓ | ×   | ↑ | 1 | [12]   | ✓ | × | ↑ | 1 | [12]   | × | - |   |   |       |

|         |        |                 |                 |                 |       |              |              |     |
|---------|--------|-----------------|-----------------|-----------------|-------|--------------|--------------|-----|
| PEBP1   | P30086 | ✓ × ⇅ 2 [20 24] | ✓ × ↑ 1 [20]    | ✓ × ↓ 1 [24]    | × - - | ✓ × ↑ 1 [12] | ✓ × ↑ 1 [12] | × - |
| IGHG1   | P01857 | ✓ ✓ ↑ 2 [15 18] | ✓ × ↑ 1 [15]    | ✓ × ↑ 1 [18]    | × - - | × -          | × -          | × - |
| HRG     | P04196 | ✓ ✓ ↑ 2 [15 27] | ✓ ✓ ↑ 2 [15 27] | × -             | × - - | × -          | × -          | × - |
| APOA2   | P02652 | ✓ ✓ ↑ 2 [15 24] | ✓ × ↑ 1 [15]    | ✓ × ↑ 1 [24]    | × - - | × -          | × -          | × - |
| NPDC1   | Q9NQX5 | ✓ × ⇅ 2 [15 24] | ✓ × ↑ 1 [15]    | ✓ × ↓ 1 [24]    | × - - | × -          | × -          | × - |
| CXCL16  | Q9H2A7 | ✓ × ⇅ 2 [15 29] | ✓ × ↓ 1 [15]    | ✓ × ↑ 1 [29]    | × - - | × -          | × -          | × - |
| GM2A    | P17900 | ✓ × ⇅ 2 [15 21] | ✓ × ↓ 1 [15]    | ✓ × ↑ 1 [21]    | × - - | × -          | × -          | × - |
| RNASE6  | Q93091 | ✓ × ⇅ 2 [15 29] | ✓ × ↓ 1 [15]    | ✓ × ↑ 1 [29]    | × - - | × -          | × -          | × - |
| C7      | P10643 | ✓ × ⇅ 2 [15 20] | ✓ × ⇅ 2 [15 20] | × -             | × - - | × -          | × -          | × - |
| FGB     | P02675 | ✓ ✓ ↑ 2 [18 24] | × -             | ✓ ✓ ↑ 2 [18 24] | × - - | × -          | × -          | × - |
| RBP1    | P09455 | ✓ ✓ ↑ 2 [18 22] | ✓ × ↑ 1 [22]    | ✓ × ↑ 1 [18]    | × - - | × -          | × -          | × - |
| LTBP2   | Q14767 | ✓ ✓ ↑ 2 [20 24] | ✓ × ↑ 1 [20]    | ✓ × ↑ 1 [24]    | × - - | × -          | × -          | × - |
| A1BG    | P04217 | ✓ × ⇅ 2 [20 26] | ✓ × ⇅ 2 [20 26] | × -             | × - - | × -          | × -          | × - |
| COL1A2  | P08123 | ✓ ✓ ↑ 2 [20 24] | ✓ × ↑ 1 [20]    | ✓ × ↑ 1 [24]    | × - - | × -          | × -          | × - |
| DDAH1   | O94760 | ✓ ✓ ↑ 2 [20 29] | ✓ × ↑ 1 [20]    | ✓ × ↑ 1 [29]    | × - - | × -          | × -          | × - |
| FGFR1   | P11362 | ✓ × ⇅ 2 [20 29] | ✓ × ↑ 1 [20]    | ✓ × ↓ 1 [29]    | × - - | × -          | × -          | × - |
| IGFBP5  | P24593 | ✓ ✓ ↑ 2 [20 24] | ✓ × ↑ 1 [20]    | ✓ × ↑ 1 [24]    | × - - | × -          | × -          | × - |
| MGAT1   | P26572 | ✓ × ⇅ 2 [20 24] | ✓ × ↑ 1 [20]    | ✓ × ↓ 1 [24]    | × - - | × -          | × -          | × - |
| MGP     | P08493 | ✓ ✓ ↑ 2 [20 24] | ✓ × ↑ 1 [20]    | ✓ × ↑ 1 [24]    | × - - | × -          | × -          | × - |
| TREM2   | Q9NZC2 | ✓ ✓ ↑ 2 [20 21] | ✓ × ↑ 1 [20]    | ✓ × ↑ 1 [21]    | × - - | × -          | × -          | × - |
| ATP6AP1 | Q15904 | ✓ ✓ ↓ 2 [20 24] | ✓ × ↓ 1 [20]    | ✓ × ↓ 1 [24]    | × - - | × -          | × -          | × - |
| PTPRN   | Q16849 | ✓ ✓ ↓ 2 [20 24] | ✓ × ↓ 1 [20]    | ✓ × ↓ 1 [24]    | × - - | × -          | × -          | × - |
| IGF2    | P01344 | ✓ ✓ ↑ 2 [21 24] | × -             | ✓ ✓ ↑ 2 [21 24] | × - - | × -          | × -          | × - |
| TF      | P02787 | ✓ × ⇅ 2 [21 26] | ✓ × ↓ 1 [26]    | ✓ × ↑ 1 [21]    | × - - | × -          | × -          | × - |
| AZGP1   | P25311 | ✓ ✓ ↑ 2 [22 28] | ✓ ✓ ↑ 2 [22 28] | × -             | × - - | × -          | × -          | × - |

|          |                   |                 |                 |                 |              |                  |               |             |
|----------|-------------------|-----------------|-----------------|-----------------|--------------|------------------|---------------|-------------|
| NRXN3    | Q9HDB5#<br>Q14257 | ✓ × ⇅ 2 [23 29] | × -             | ✓ × ⇅ 2 [23 29] | × - -        | × -              | × -           | × -         |
| LYNX1    | P0DP58            | ✓ ✓ ↓ 2 [24 29] | × -             | ✓ ✓ ↓ 2 [24 29] | × - -        | × -              | × -           | × -         |
| TAC1     | P20366            | ✓ ✓ ↓ 2 [24 29] | × -             | ✓ ✓ ↓ 2 [24 29] | × - -        | × -              | × -           | × -         |
| C11orf87 | Q6NUJ2            | ✓ ✓ ↓ 2 [24 29] | × -             | ✓ ✓ ↓ 2 [24 29] | × - -        | × -              | × -           | × -         |
| AHSG     | P02765            | ✓ ✓ ↓ 2 [25 26] | ✓ ✓ ↓ 2 [25 26] | × -             | ✓ × ↓ 1 [27] | × -              | × -           | × -         |
| NCAM1    | P13591            | ✓ ✓ ↑ 2 [28 29] | ✓ × ↑ 1 [28]    | ✓ × ↑ 1 [29]    | × - -        | × -              | × -           | × -         |
| RETN     | Q9HD89            | ✓ × ↑ 1 [3]     | ✓ × ↑ 1 [3]     | × -             | × - -        | ✓ × ↑ 1 [3]      | ✓ × ↑ 1 [3]   | ✓ × ↑ 1 [1] |
| PRL      | P01236            | ✓ × ↑ 1 [10]    | × -             | ✓ × ↑ 1 [10]    | × - -        | ✓ × ↑ 1 [10]     | × -           | ✓ × ↑ 1 [1] |
| HGF      | P14210            | ✓ × ↑ 1 [3]     | ✓ × ↑ 1 [3]     | × -             | × - -        | ✓ ✓ ↑ 3 [3 4 10] | ✓ ✓ ↑ 2 [3 4] | ✓ × ↑ 1 [1] |
| CALM3    | P0DP25            | ✓ × ↑ 1 [2]     | ✓ × ↑ 1 [2]     | × -             | × - -        | × -              | × -           | × -         |
| CDH2     | P19022            | ✓ × ↑ 1 [2]     | ✓ × ↑ 1 [2]     | × -             | × - -        | × -              | × -           | × -         |
| KNG1     | P01042            | ✓ × ↑ 1 [2]     | ✓ × ↑ 1 [2]     | × -             | × - -        | × -              | × -           | × -         |
| VTN      | P04004            | ✓ × ↑ 1 [2]     | ✓ × ↑ 1 [2]     | × -             | × - -        | × -              | × -           | × -         |
| C4B      | P0C0L5            | ✓ × ↑ 1 [2]     | ✓ × ↑ 1 [2]     | × -             | × - -        | × -              | × -           | × -         |
| ANXA1    | P04083            | ✓ × ↓ 1 [2]     | ✓ × ↓ 1 [2]     | × -             | × - -        | × -              | × -           | × -         |
| S100A1   | P23297            | ✓ × ↓ 1 [2]     | ✓ × ↓ 1 [2]     | × -             | × - -        | × -              | × -           | × -         |
| APOC3    | P02656            | ✓ × ↓ 1 [2]     | ✓ × ↓ 1 [2]     | × -             | × - -        | × -              | × -           | × -         |
| B3GNT6   | Q6ZMB0            | ✓ × ↓ 1 [2]     | ✓ × ↓ 1 [2]     | × -             | × - -        | × -              | × -           | × -         |
| MAN1A1   | P33908            | ✓ × ↓ 1 [2]     | ✓ × ↓ 1 [2]     | × -             | × - -        | × -              | × -           | × -         |
| CADM3    | Q8N126            | ✓ × ↓ 1 [2]     | ✓ × ↓ 1 [2]     | × -             | × - -        | × -              | × -           | × -         |
| CA4      | P22748            | ✓ × ↓ 1 [2]     | ✓ × ↓ 1 [2]     | × -             | × - -        | × -              | × -           | × -         |
| CXCL1    | P09341            | ✓ × ↑ 1 [3]     | ✓ × ↑ 1 [3]     | × -             | × - -        | ✓ × ↑ 1 [10]     | × -           | × -         |
| MMP10    | P09238            | ✓ × ↑ 1 [3]     | ✓ × ↑ 1 [3]     | × -             | × - -        | ✓ × ↑ 1 [3]      | ✓ × ↑ 1 [3]   | ✓ × ↓ 1 [3] |
| NPPB     | P16860            | ✓ × ↑ 1 [3]     | ✓ × ↑ 1 [3]     | × -             | × - -        | ✓ × ↑ 1 [3]      | ✓ × ↑ 1 [3]   | × -         |
| SERPINE1 | P05121            | ✓ × ↑ 1 [3]     | ✓ × ↑ 1 [3]     | × -             | × - -        | ✓ ✓ ↑ 2 [3 10]   | ✓ × ↑ 1 [3]   | × -         |

|                |        |              |              |              |       |                  |               |             |
|----------------|--------|--------------|--------------|--------------|-------|------------------|---------------|-------------|
| PPY            | P01298 | ✓ × ↑ 1 [3]  | ✓ × ↑ 1 [3]  | × -          | × - - | ✓ ✓ ↑ 2 [3 10]   | ✓ × ↑ 1 [3]   | × -         |
| FAS            | P25445 | ✓ × ↑ 1 [3]  | ✓ × ↑ 1 [3]  | × -          | × - - | ✓ ✓ ↑ 2 [3 10]   | ✓ × ↑ 1 [3]   | × -         |
| MIF            | P14174 | ✓ × ↑ 1 [3]  | ✓ × ↑ 1 [3]  | × -          | × - - | ✓ ✓ ↑ 2 [3 10]   | ✓ × ↑ 1 [3]   | × -         |
| CCL8           | P80075 | ✓ × ↑ 1 [3]  | ✓ × ↑ 1 [3]  | × -          | × - - | × -              | × -           | × -         |
| FGA            | P02671 | ✓ × ↑ 1 [3]  | ✓ × ↑ 1 [3]  | × -          | × - - | ✓ × ↑ 1 [3]      | ✓ × ↑ 1 [3]   | × -         |
| CCL25          | O15444 | ✓ × ↑ 1 [3]  | ✓ × ↑ 1 [3]  | × -          | × - - | ✓ × ↑ 1 [3]      | ✓ × ↑ 1 [3]   | × -         |
| HAVCR1         | Q96D42 | ✓ × ↑ 1 [3]  | ✓ × ↑ 1 [3]  | × -          | × - - | ✓ × ↓ 1 [3]      | ✓ × ↓ 1 [3]   | × -         |
| HBEGF          | Q99075 | ✓ × ↑ 1 [3]  | ✓ × ↑ 1 [3]  | × -          | × - - | ✓ ✓ ↑ 2 [3 4]    | ✓ ✓ ↑ 2 [3 4] | × -         |
| FASLG          | P48023 | ✓ × ↑ 1 [3]  | ✓ × ↑ 1 [3]  | × -          | × - - | ✓ × ↑ 1 [3]      | ✓ × ↑ 1 [3]   | × -         |
| IL10           | P22301 | ✓ × ↑ 1 [3]  | ✓ × ↑ 1 [3]  | × -          | × - - | × -              | × -           | × -         |
| TNFRSF1BP20333 |        | ✓ × ↑ 1 [3]  | ✓ × ↑ 1 [3]  | × -          | × - - | ✓ × ⇅ 3 [3 4 10] | ✓ × ⇅ 2 [3 4] | × -         |
| CCL16          | O15467 | ✓ × ↑ 1 [3]  | ✓ × ↑ 1 [3]  | × -          | × - - | ✓ × ↑ 1 [10]     | × -           | × -         |
| CXCL10         | P02778 | ✓ × ↑ 1 [3]  | ✓ × ↑ 1 [3]  | × -          | × - - | ✓ × ↑ 1 [3]      | ✓ × ↑ 1 [3]   | × -         |
| CXCL9          | Q07325 | ✓ × ↑ 1 [3]  | ✓ × ↑ 1 [3]  | × -          | × - - | ✓ × ↑ 1 [3]      | ✓ × ↑ 1 [3]   | × -         |
| THBD           | P07204 | ✓ × ↑ 1 [3]  | ✓ × ↑ 1 [3]  | × -          | × - - | ✓ × ↑ 1 [3]      | ✓ × ↑ 1 [3]   | ✓ × ↑ 1 [3] |
| THPO           | P40225 | ✓ × ↓ 1 [3]  | ✓ × ↓ 1 [3]  | × -          | × - - | × -              | × -           | ✓ × ↑ 1 [3] |
| CKM            | P06732 | ✓ × ↓ 1 [3]  | ✓ × ↓ 1 [3]  | × -          | × - - | × -              | × -           | × -         |
| IL25           | Q9H293 | ✓ × ↓ 1 [3]  | ✓ × ↓ 1 [3]  | × -          | × - - | × -              | × -           | × -         |
| CALB1          | P05937 | ✓ × ↑ 1 [20] | ✓ × ↑ 1 [20] | × -          | × - - | ✓ × ↑ 1 [3]      | ✓ × ↑ 1 [3]   | × -         |
| CSF1           | P09603 | ✓ × ↑ 1 [20] | ✓ × ↑ 1 [20] | × -          | × - - | ✓ × ↑ 1 [4]      | ✓ × ↑ 1 [4]   | × -         |
| S100B          | P04271 | ✓ × ↑ 1 [21] | × -          | ✓ × ↑ 1 [21] | × - - | ✓ × ↑ 1 [4]      | ✓ × ↑ 1 [4]   | × -         |
| OLR1           | P78380 | ✓ × ↑ 1 [29] | × -          | ✓ × ↑ 1 [29] | × - - | ✓ × ↓ 1 [4]      | ✓ × ↓ 1 [4]   | × -         |
| C1QB           | P02746 | ✓ × ↓ 1 [5]  | ✓ × ↓ 1 [5]  | × -          | × - - | × -              | × -           | × -         |
| RNASE1         | P07998 | ✓ × ↑ 1 [7]  | ✓ × ↑ 1 [7]  | × -          | × - - | × -              | × -           | × -         |
| APOC1          | P02654 | ✓ × ↓ 1 [7]  | ✓ × ↓ 1 [7]  | × -          | × - - | × -              | × -           | × -         |

|        |        |              |              |              |             |                |                |     |
|--------|--------|--------------|--------------|--------------|-------------|----------------|----------------|-----|
| VSTM2A | Q8TAG5 | ✓ × ⇅ 1 [29] | × -          | ✓ × ⇅ 1 [29] | × - -       | ✓ ✓ ↑ 2 [8 12] | ✓ ✓ ↑ 2 [8 12] | × - |
| UBC    | P0CG48 | ✓ × ↑ 1 [21] | × -          | ✓ × ↑ 1 [21] | ✓ × ↑ 1 [9] | × -            | × -            | × - |
| C4A    | P0C0L4 | ✓ × ↑ 1 [15] | ✓ × ↑ 1 [15] | × -          | ✓ × ↑ 1 [9] | × -            | × -            | × - |
| PDGFA  | P04085 | ✓ × ↑ 1 [10] | × -          | ✓ × ↑ 1 [10] | × - -       | × -            | × -            | × - |
| ADIPOQ | Q15848 | ✓ × ↑ 1 [10] | × -          | ✓ × ↑ 1 [10] | × - -       | × -            | × -            | × - |
| CALCA  | P01258 | ✓ × ↑ 1 [10] | × -          | ✓ × ↑ 1 [10] | × - -       | × -            | × -            | × - |
| IL1A   | P01583 | ✓ × ↑ 1 [10] | × -          | ✓ × ↑ 1 [10] | × - -       | × -            | × -            | × - |
| IL23A  | Q9NPF7 | ✓ × ↑ 1 [10] | × -          | ✓ × ↑ 1 [10] | × - -       | × -            | × -            | × - |
| CCL1   | P22362 | ✓ × ↑ 1 [10] | × -          | ✓ × ↑ 1 [10] | × - -       | ✓ × ↑ 1 [10]   | × -            | × - |
| MB     | P02144 | ✓ × ↑ 1 [10] | × -          | ✓ × ↑ 1 [10] | × - -       | × -            | × -            | × - |
| MPO    | P05164 | ✓ × ↑ 1 [10] | × -          | ✓ × ↑ 1 [10] | × - -       | × -            | × -            | × - |
| COL1A1 | P02452 | ✓ × ↑ 1 [11] | × -          | ✓ × ↑ 1 [11] | × - -       | × -            | × -            | × - |
| FXYD1  | O00168 | ✓ × ↑ 1 [11] | × -          | ✓ × ↑ 1 [11] | × - -       | × -            | × -            | × - |
| APLP2  | Q06481 | ✓ × ↓ 1 [11] | × -          | ✓ × ↓ 1 [11] | × - -       | × -            | × -            | × - |
| BCAN   | Q96GW7 | ✓ × ↓ 1 [11] | × -          | ✓ × ↓ 1 [11] | × - -       | × -            | × -            | × - |
| CCK    | P06307 | ✓ × ↓ 1 [11] | × -          | ✓ × ↓ 1 [11] | × - -       | × -            | × -            | × - |
| SZT2   | Q5T011 | ✓ × ↑ 1 [12] | × -          | ✓ × ↑ 1 [12] | × - -       | ✓ × ↑ 1 [12]   | ✓ × ↑ 1 [12]   | × - |
| GAP43  | P17677 | ✓ × ↑ 1 [12] | × -          | ✓ × ↑ 1 [12] | × - -       | ✓ × ↑ 1 [12]   | ✓ × ↑ 1 [12]   | × - |
| BASP1  | P80723 | ✓ × ↓ 1 [24] | × -          | ✓ × ↓ 1 [24] | × - -       | ✓ × ↑ 1 [12]   | ✓ × ↑ 1 [12]   | × - |
| PKM    | P14618 | ✓ × ↑ 1 [29] | × -          | ✓ × ↑ 1 [29] | × - -       | ✓ × ↑ 1 [12]   | ✓ × ↑ 1 [12]   | × - |
| NEDD8  | Q15843 | ✓ × ↑ 1 [20] | ✓ × ↑ 1 [20] | × -          | × - -       | ✓ × ↑ 1 [12]   | ✓ × ↑ 1 [12]   | × - |
| ALDOA  | P04075 | ✓ × ↑ 1 [20] | ✓ × ↑ 1 [20] | × -          | × - -       | ✓ × ↑ 1 [12]   | ✓ × ↑ 1 [12]   | × - |
| NRGN   | Q92686 | ✓ × ↑ 1 [29] | × -          | ✓ × ↑ 1 [29] | × - -       | ✓ × ↑ 1 [12]   | × -            | × - |
| FAIM2  | Q9BWQ8 | ✓ × ↑ 1 [20] | ✓ × ↑ 1 [20] | × -          | × - -       | ✓ × ↑ 1 [12]   | ✓ × ↑ 1 [12]   | × - |
| YWHAB  | P31946 | ✓ × ↑ 1 [29] | × -          | ✓ × ↑ 1 [29] | × - -       | ✓ × ↑ 1 [12]   | ✓ × ↑ 1 [12]   | × - |

|          |        |              |              |              |              |              |              |              |
|----------|--------|--------------|--------------|--------------|--------------|--------------|--------------|--------------|
| EPHB6    | O15197 | ✓ × ↓ 1 [20] | ✓ × ↓ 1 [20] | × -          | × - -        | ✓ × ↑ 1 [12] | ✓ × ↑ 1 [12] | × -          |
| PGAM1    | P18669 | ✓ × ↑ 1 [20] | ✓ × ↑ 1 [20] | × -          | × - -        | ✓ × ↑ 1 [12] | × -          | × -          |
| TMSB4X   | P62328 | ✓ × ↑ 1 [20] | ✓ × ↑ 1 [20] | × -          | × - -        | ✓ × ↑ 1 [12] | ✓ × ↑ 1 [12] | × -          |
| SUSD5    | O60279 | ✓ × ↓ 1 [24] | × -          | ✓ × ↓ 1 [24] | × - -        | ✓ × ↑ 1 [12] | ✓ × ↑ 1 [12] | × -          |
| CDH13    | P55290 | ✓ × ↓ 1 [24] | × -          | ✓ × ↓ 1 [24] | × - -        | ✓ × ↑ 1 [12] | ✓ × ↑ 1 [12] | × -          |
| LDHB     | P07195 | ✓ × ↑ 1 [20] | ✓ × ↑ 1 [20] | × -          | × - -        | ✓ × ↑ 1 [12] | × -          | × -          |
| SH3BGRL  | O75368 | ✓ × ↑ 1 [20] | ✓ × ↑ 1 [20] | × -          | × - -        | ✓ × ↑ 1 [12] | × -          | × -          |
| LY6H     | O94772 | ✓ × ↓ 1 [29] | × -          | ✓ × ↓ 1 [29] | × - -        | ✓ × ↑ 1 [12] | ✓ × ↑ 1 [12] | × -          |
| CADM2    | Q8N3J6 | ✓ × ↓ 1 [27] | ✓ × ↓ 1 [27] | × -          | ✓ × ↓ 1 [27] | ✓ × ↑ 1 [12] | × -          | × -          |
| ENPP2    | Q13822 | ✓ × ↑ 1 [21] | × -          | ✓ × ↑ 1 [21] | × - -        | ✓ × ↓ 1 [12] | × -          | × -          |
| ADAM10   | O14672 | ✓ × ↑ 1 [24] | × -          | ✓ × ↑ 1 [24] | × - -        | × -          | ✓ × ↑ 1 [12] | × -          |
| CYTL1    | Q9NRR1 | ✓ × ↑ 1 [24] | × -          | ✓ × ↑ 1 [24] | × - -        | × -          | ✓ × ↑ 1 [12] | × -          |
| SST      | P61278 | ✓ × ↓ 1 [29] | × -          | ✓ × ↓ 1 [29] | × - -        | × -          | × -          | ✓ × ↑ 1 [12] |
| PCSK2    | P16519 | ✓ × ↓ 1 [25] | ✓ × ↓ 1 [25] | × -          | × - -        | × -          | × -          | ✓ × ↑ 1 [12] |
| CADPS2   | Q86UW7 | ✓ × ↑ 1 [15] | ✓ × ↑ 1 [15] | × -          | × - -        | × -          | × -          | × -          |
| C1R      | P00736 | ✓ × ↑ 1 [15] | ✓ × ↑ 1 [15] | × -          | × - -        | × -          | × -          | × -          |
| CTSB     | P07858 | ✓ × ↑ 1 [15] | ✓ × ↑ 1 [15] | × -          | × - -        | × -          | × -          | × -          |
| F7       | P08709 | ✓ × ↑ 1 [15] | ✓ × ↑ 1 [15] | × -          | × - -        | × -          | × -          | × -          |
| MEGF10   | Q96KG7 | ✓ × ↑ 1 [15] | ✓ × ↑ 1 [15] | × -          | × - -        | × -          | × -          | × -          |
| TUBA3C   | P0DPH7 | ✓ × ↑ 1 [15] | ✓ × ↑ 1 [15] | × -          | × - -        | × -          | × -          | × -          |
| HSPD1    | P10809 | ✓ × ↑ 1 [15] | ✓ × ↑ 1 [15] | × -          | × - -        | × -          | × -          | × -          |
| SELENBP1 | Q13228 | ✓ × ↑ 1 [15] | ✓ × ↑ 1 [15] | × -          | × - -        | × -          | × -          | × -          |
| CD14     | P08571 | ✓ × ↑ 1 [15] | ✓ × ↑ 1 [15] | × -          | × - -        | × -          | × -          | × -          |
| IGKC     | P01834 | ✓ × ↑ 1 [15] | ✓ × ↑ 1 [15] | × -          | × - -        | × -          | × -          | × -          |
| PROS1    | P07225 | ✓ × ↑ 1 [15] | ✓ × ↑ 1 [15] | × -          | × - -        | × -          | × -          | × -          |



|          |        |              |              |     |       |     |     |     |
|----------|--------|--------------|--------------|-----|-------|-----|-----|-----|
| CFB      | P00751 | ✓ × ↑ 1 [15] | ✓ × ↑ 1 [15] | × - | × - - | × - | × - | × - |
| HNRNPU   | Q00839 | ✓ × ↑ 1 [15] | ✓ × ↑ 1 [15] | × - | × - - | × - | × - | × - |
| HPX      | P02790 | ✓ × ↑ 1 [15] | ✓ × ↑ 1 [15] | × - | × - - | × - | × - | × - |
| SERPINC1 | P01008 | ✓ × ↑ 1 [15] | ✓ × ↑ 1 [15] | × - | × - - | × - | × - | × - |
| OGN      | P20774 | ✓ × ⇕ 1 [15] | ✓ × ⇕ 1 [15] | × - | × - - | × - | × - | × - |
| IGFBP6   | P24592 | ✓ × ↓ 1 [15] | ✓ × ↓ 1 [15] | × - | × - - | × - | × - | × - |
| LGALS3BP | Q08380 | ✓ × ↓ 1 [15] | ✓ × ↓ 1 [15] | × - | × - - | × - | × - | × - |
| IGHA22   |        | ✓ × ↓ 1 [15] | ✓ × ↓ 1 [15] | × - | × - - | × - | × - | × - |
| EEF1G    | P26641 | ✓ × ↓ 1 [15] | ✓ × ↓ 1 [15] | × - | × - - | × - | × - | × - |
| RCC1L    | Q96I51 | ✓ × ↓ 1 [15] | ✓ × ↓ 1 [15] | × - | × - - | × - | × - | × - |
| EPRS     | P07814 | ✓ × ↓ 1 [15] | ✓ × ↓ 1 [15] | × - | × - - | × - | × - | × - |
| ILKAP    | Q9H0C8 | ✓ × ↓ 1 [15] | ✓ × ↓ 1 [15] | × - | × - - | × - | × - | × - |
| ADAM22   | Q9P0K1 | ✓ × ↓ 1 [15] | ✓ × ↓ 1 [15] | × - | × - - | × - | × - | × - |
| HSPA6    | P17066 | ✓ × ↓ 1 [15] | ✓ × ↓ 1 [15] | × - | × - - | × - | × - | × - |
| HSPA1B   | P0DMV9 | ✓ × ↓ 1 [15] | ✓ × ↓ 1 [15] | × - | × - - | × - | × - | × - |
| HSPA1A   | P0DMV8 | ✓ × ↓ 1 [15] | ✓ × ↓ 1 [15] | × - | × - - | × - | × - | × - |
| B3GNT2   | Q9NY97 | ✓ × ↓ 1 [15] | ✓ × ↓ 1 [15] | × - | × - - | × - | × - | × - |
| B3GNT3   | Q9Y2A9 | ✓ × ↓ 1 [15] | ✓ × ↓ 1 [15] | × - | × - - | × - | × - | × - |
| PRNP     | P04156 | ✓ × ↓ 1 [15] | ✓ × ↓ 1 [15] | × - | × - - | × - | × - | × - |
| IGSF8    | Q969P0 | ✓ × ↓ 1 [15] | ✓ × ↓ 1 [15] | × - | × - - | × - | × - | × - |
| CANX     | P27824 | ✓ × ↓ 1 [15] | ✓ × ↓ 1 [15] | × - | × - - | × - | × - | × - |
| DCD      | P81605 | ✓ × ↓ 1 [15] | ✓ × ↓ 1 [15] | × - | × - - | × - | × - | × - |
| HNRNPDL  | O14979 | ✓ × ↓ 1 [15] | ✓ × ↓ 1 [15] | × - | × - - | × - | × - | × - |
| PRKDC    | P78527 | ✓ × ↓ 1 [15] | ✓ × ↓ 1 [15] | × - | × - - | × - | × - | × - |
| DHX9     | Q08211 | ✓ × ↓ 1 [15] | ✓ × ↓ 1 [15] | × - | × - - | × - | × - | × - |

|          |        |              |              |              |              |     |     |     |
|----------|--------|--------------|--------------|--------------|--------------|-----|-----|-----|
| LY75     | O60449 | ✓ × ↓ 1 [15] | ✓ × ↓ 1 [15] | × -          | × - -        | × - | × - | × - |
| DLGAP2   | Q9P1A6 | ✓ × ↓ 1 [15] | ✓ × ↓ 1 [15] | × -          | × - -        | × - | × - | × - |
| CEMP2    | Q9UHN6 | ✓ × ↓ 1 [15] | ✓ × ↓ 1 [15] | × -          | × - -        | × - | × - | × - |
| ATAD2    | Q6PL18 | ✓ × ↓ 1 [15] | ✓ × ↓ 1 [15] | × -          | × - -        | × - | × - | × - |
| FGG      | P02679 | ✓ × ↑ 1 [16] | ✓ × ↑ 1 [16] | × -          | ✓ × ↑ 1 [16] | × - | × - | × - |
| CNTN1    | Q12860 | ✓ × ↑ 1 [18] | × -          | ✓ × ↑ 1 [18] | ✓ × ↓ 1 [27] | × - | × - | × - |
| PLG      | P00747 | ✓ × ↑ 1 [18] | × -          | ✓ × ↑ 1 [18] | × - -        | × - | × - | × - |
| POLG     | P54098 | ✓ × ↓ 1 [19] | × -          | ✓ × ↓ 1 [19] | × - -        | × - | × - | × - |
| MGMT     | P16455 | ✓ × ↓ 1 [19] | × -          | ✓ × ↓ 1 [19] | × - -        | × - | × - | × - |
| PRKN     | O60260 | ✓ × ↓ 1 [19] | × -          | ✓ × ↓ 1 [19] | × - -        | × - | × - | × - |
| PAWR     | Q96IZ0 | ✓ × ↓ 1 [19] | × -          | ✓ × ↓ 1 [19] | × - -        | × - | × - | × - |
| GZMB     | P10144 | ✓ × ↓ 1 [19] | × -          | ✓ × ↓ 1 [19] | × - -        | × - | × - | × - |
| CDK5     | Q00535 | ✓ × ↓ 1 [19] | × -          | ✓ × ↓ 1 [19] | × - -        | × - | × - | × - |
| COMP     | P49747 | ✓ × ↑ 1 [20] | ✓ × ↑ 1 [20] | × -          | × - -        | × - | × - | × - |
| CD44     | P16070 | ✓ × ↑ 1 [20] | ✓ × ↑ 1 [20] | × -          | × - -        | × - | × - | × - |
| COL18A1  | P39060 | ✓ × ↑ 1 [20] | ✓ × ↑ 1 [20] | × -          | × - -        | × - | × - | × - |
| CRISPLD1 | Q9H336 | ✓ × ↑ 1 [20] | ✓ × ↑ 1 [20] | × -          | × - -        | × - | × - | × - |
| MSN      | P26038 | ✓ × ↑ 1 [20] | ✓ × ↑ 1 [20] | × -          | × - -        | × - | × - | × - |
| PFN1     | P07737 | ✓ × ↑ 1 [20] | ✓ × ↑ 1 [20] | × -          | × - -        | × - | × - | × - |
| SDC2     | P34741 | ✓ × ↑ 1 [20] | ✓ × ↑ 1 [20] | × -          | × - -        | × - | × - | × - |
| VCAN     | P13611 | ✓ × ↑ 1 [20] | ✓ × ↑ 1 [20] | × -          | × - -        | × - | × - | × - |
| IGFBP3   | P17936 | ✓ × ↑ 1 [20] | ✓ × ↑ 1 [20] | × -          | × - -        | × - | × - | × - |
| PPIA     | P62937 | ✓ × ↑ 1 [20] | ✓ × ↑ 1 [20] | × -          | × - -        | × - | × - | × - |
| TAGLN    | Q01995 | ✓ × ↑ 1 [20] | ✓ × ↑ 1 [20] | × -          | × - -        | × - | × - | × - |
| CBR1     | P16152 | ✓ × ↑ 1 [20] | ✓ × ↑ 1 [20] | × -          | × - -        | × - | × - | × - |

|        |        |              |              |     |       |     |     |
|--------|--------|--------------|--------------|-----|-------|-----|-----|
| PARK7  | Q99497 | ✓ × ↑ 1 [20] | ✓ × ↑ 1 [20] | × - | × - - | × - | × - |
| HEXA   | P06865 | ✓ × ↑ 1 [20] | ✓ × ↑ 1 [20] | × - | × - - | × - | × - |
| ADM    | P35318 | ✓ × ↑ 1 [20] | ✓ × ↑ 1 [20] | × - | × - - | × - | × - |
| FCGR3A | P08637 | ✓ × ↑ 1 [20] | ✓ × ↑ 1 [20] | × - | × - - | × - | × - |
| BMP1   | P13497 | ✓ × ↑ 1 [20] | ✓ × ↑ 1 [20] | × - | × - - | × - | × - |
| CALM2  | P0DP24 | ✓ × ↑ 1 [20] | ✓ × ↑ 1 [20] | × - | × - - | × - | × - |
| F9     | P00740 | ✓ × ↑ 1 [20] | ✓ × ↑ 1 [20] | × - | × - - | × - | × - |
| F10    | P00742 | ✓ × ↑ 1 [20] | ✓ × ↑ 1 [20] | × - | × - - | × - | × - |
| CFL1   | P23528 | ✓ × ↑ 1 [20] | ✓ × ↑ 1 [20] | × - | × - - | × - | × - |
| FCGBP  | Q9Y6R7 | ✓ × ↑ 1 [20] | ✓ × ↑ 1 [20] | × - | × - - | × - | × - |
| LDHA   | P00338 | ✓ × ↑ 1 [20] | ✓ × ↑ 1 [20] | × - | × - - | × - | × - |
| LTBP1  | Q14766 | ✓ × ↑ 1 [20] | ✓ × ↑ 1 [20] | × - | × - - | × - | × - |
| MLEC   | Q14165 | ✓ × ↑ 1 [20] | ✓ × ↑ 1 [20] | × - | × - - | × - | × - |
| YWHAE  | P62258 | ✓ × ↑ 1 [20] | ✓ × ↑ 1 [20] | × - | × - - | × - | × - |
| PI16   | Q6UXB8 | ✓ × ↑ 1 [20] | ✓ × ↑ 1 [20] | × - | × - - | × - | × - |
| PGK1   | P00558 | ✓ × ↑ 1 [20] | ✓ × ↑ 1 [20] | × - | × - - | × - | × - |
| SUMO4  | Q6EEV6 | ✓ × ↑ 1 [20] | ✓ × ↑ 1 [20] | × - | × - - | × - | × - |
| SDF4   | Q9BRK5 | ✓ × ↑ 1 [20] | ✓ × ↑ 1 [20] | × - | × - - | × - | × - |
| SNED1  | Q8TER0 | ✓ × ↑ 1 [20] | ✓ × ↑ 1 [20] | × - | × - - | × - | × - |
| VNN1   | O95497 | ✓ × ↑ 1 [20] | ✓ × ↑ 1 [20] | × - | × - - | × - | × - |
| VCL    | P18206 | ✓ × ↑ 1 [20] | ✓ × ↑ 1 [20] | × - | × - - | × - | × - |
| CDH8   | P55286 | ✓ × ↓ 1 [20] | ✓ × ↓ 1 [20] | × - | × - - | × - | × - |
| GANAB  | Q14697 | ✓ × ↓ 1 [20] | ✓ × ↓ 1 [20] | × - | × - - | × - | × - |
| RELN   | P78509 | ✓ × ↓ 1 [20] | ✓ × ↓ 1 [20] | × - | × - - | × - | × - |
| SOD3   | P08294 | ✓ × ↓ 1 [20] | ✓ × ↓ 1 [20] | × - | × - - | × - | × - |

|           |        |              |              |              |       |     |     |
|-----------|--------|--------------|--------------|--------------|-------|-----|-----|
| SCN3B     | Q9NY72 | ✓ × ↓ 1 [20] | ✓ × ↓ 1 [20] | × -          | × - - | × - | × - |
| CDH10     | Q9Y6N8 | ✓ × ↓ 1 [20] | ✓ × ↓ 1 [20] | × -          | × - - | × - | × - |
| CHST15    | Q7LFX5 | ✓ × ↓ 1 [20] | ✓ × ↓ 1 [20] | × -          | × - - | × - | × - |
| C1QC      | P02747 | ✓ × ↓ 1 [20] | ✓ × ↓ 1 [20] | × -          | × - - | × - | × - |
| CNTN3     | Q9P232 | ✓ × ↓ 1 [20] | ✓ × ↓ 1 [20] | × -          | × - - | × - | × - |
| FAT2      | Q9NYQ8 | ✓ × ↓ 1 [20] | ✓ × ↓ 1 [20] | × -          | × - - | × - | × - |
| FSTL4     | Q6MZW2 | ✓ × ↓ 1 [20] | ✓ × ↓ 1 [20] | × -          | × - - | × - | × - |
| FSTL5     | Q8N475 | ✓ × ↓ 1 [20] | ✓ × ↓ 1 [20] | × -          | × - - | × - | × - |
| GPR158    | Q5T848 | ✓ × ↓ 1 [20] | ✓ × ↓ 1 [20] | × -          | × - - | × - | × - |
| GFRA1     | P56159 | ✓ × ↓ 1 [20] | ✓ × ↓ 1 [20] | × -          | × - - | × - | × - |
| HAPLN4    | Q86UW8 | ✓ × ↓ 1 [20] | ✓ × ↓ 1 [20] | × -          | × - - | × - | × - |
| NELL2     | Q99435 | ✓ × ↓ 1 [20] | ✓ × ↓ 1 [20] | × -          | × - - | × - | × - |
| NUCB2     | P80303 | ✓ × ↓ 1 [20] | ✓ × ↓ 1 [20] | × -          | × - - | × - | × - |
| PODXL2    | Q9NZ53 | ✓ × ↓ 1 [20] | ✓ × ↓ 1 [20] | × -          | × - - | × - | × - |
| SERPING1  | P05155 | ✓ × ↓ 1 [20] | ✓ × ↓ 1 [20] | × -          | × - - | × - | × - |
| TMEM-132A | Q24JP5 | ✓ × ↓ 1 [20] | ✓ × ↓ 1 [20] | × -          | × - - | × - | × - |
| SAA4      | P35542 | ✓ × ↑ 1 [21] | × -          | ✓ × ↑ 1 [21] | × - - | × - | × - |
| HCRT      | O43612 | ✓ × ↑ 1 [21] | × -          | ✓ × ↑ 1 [21] | × - - | × - | × - |
| UCHL1     | P09936 | ✓ × ↑ 1 [21] | × -          | ✓ × ↑ 1 [21] | × - - | × - | × - |
| LAMP1     | P11279 | ✓ × ↑ 1 [21] | × -          | ✓ × ↑ 1 [21] | × - - | × - | × - |
| LSAMP     | Q13449 | ✓ × ↑ 1 [21] | × -          | ✓ × ↑ 1 [21] | × - - | × - | × - |
| APOA4     | P06727 | ✓ × ↓ 1 [22] | ✓ × ↓ 1 [22] | × -          | × - - | × - | × - |
| RCN2      | Q14257 | ✓ × ↑ 1 [24] | × -          | ✓ × ↑ 1 [24] | × - - | × - | × - |
| TBC1D10A  | Q9BXI6 | ✓ × ↑ 1 [24] | × -          | ✓ × ↑ 1 [24] | × - - | × - | × - |
| NBL1      | P41271 | ✓ × ↑ 1 [24] | × -          | ✓ × ↑ 1 [24] | × - - | × - | × - |

|          |                                                                                                                                                                                                                                |   |   |   |   |      |   |   |   |   |   |   |      |   |   |   |   |   |   |   |   |
|----------|--------------------------------------------------------------------------------------------------------------------------------------------------------------------------------------------------------------------------------|---|---|---|---|------|---|---|---|---|---|---|------|---|---|---|---|---|---|---|---|
| SMARCE1  | Q969G3                                                                                                                                                                                                                         | ✓ | × | ↑ | 1 | [24] | × | - | ✓ | × | ↑ | 1 | [24] | × | - | × | - | × | - | × | - |
| ORM1     | P02763                                                                                                                                                                                                                         | ✓ | × | ↑ | 1 | [24] | × | - | ✓ | × | ↑ | 1 | [24] | × | - | × | - | × | - | × | - |
| GOLM1    | Q8NBJ4                                                                                                                                                                                                                         | ✓ | × | ↑ | 1 | [24] | × | - | ✓ | × | ↑ | 1 | [24] | × | - | × | - | × | - | × | - |
| XPO5     | Q9HAV4                                                                                                                                                                                                                         | ✓ | × | ↑ | 1 | [24] | × | - | ✓ | × | ↑ | 1 | [24] | × | - | × | - | × | - | × | - |
| HERC4    | Q5GLZ8                                                                                                                                                                                                                         | ✓ | × | ↑ | 1 | [24] | × | - | ✓ | × | ↑ | 1 | [24] | × | - | × | - | × | - | × | - |
| KLK6     | Q92876                                                                                                                                                                                                                         | ✓ | × | ↑ | 1 | [24] | × | - | ✓ | × | ↑ | 1 | [24] | × | - | × | - | × | - | × | - |
| TCERG1   | O14776                                                                                                                                                                                                                         | ✓ | × | ↑ | 1 | [24] | × | - | ✓ | × | ↑ | 1 | [24] | × | - | × | - | × | - | × | - |
| COCH     | O43405                                                                                                                                                                                                                         | ✓ | × | ↑ | 1 | [24] | × | - | ✓ | × | ↑ | 1 | [24] | × | - | × | - | × | - | × | - |
| AMBP     | P02760                                                                                                                                                                                                                         | ✓ | × | ↑ | 1 | [24] | × | - | ✓ | × | ↑ | 1 | [24] | × | - | × | - | × | - | × | - |
| HLA-B    | P01889#<br>P03989<br>P10319<br>P18463-65<br>P30460-62<br>P30464<br>P30466<br>P30685<br>P30475<br>P30479-81<br>P30483-88<br>P30490-93<br>P30495<br>P30498<br>Q04826<br>Q29718<br>Q29836<br>Q29940<br>Q31610<br>Q31612<br>Q95365 | ✓ | × | ↑ | 1 | [24] | × | - | ✓ | × | ↑ | 1 | [24] | × | - | × | - | × | - | × | - |
| HLA-E    | P13747                                                                                                                                                                                                                         | ✓ | × | ↑ | 1 | [24] | × | - | ✓ | × | ↑ | 1 | [24] | × | - | × | - | × | - | × | - |
| IGHV1-69 | P01742                                                                                                                                                                                                                         | ✓ | × | ↑ | 1 | [24] | × | - | ✓ | × | ↑ | 1 | [24] | × | - | × | - | × | - | × | - |
| ITIH1    | P19827                                                                                                                                                                                                                         | ✓ | × | ↑ | 1 | [24] | × | - | ✓ | × | ↑ | 1 | [24] | × | - | × | - | × | - | × | - |
| OGT      | O15294                                                                                                                                                                                                                         | ✓ | × | ↑ | 1 | [24] | × | - | ✓ | × | ↑ | 1 | [24] | × | - | × | - | × | - | × | - |
| CACNG6   | Q9BXT2                                                                                                                                                                                                                         | ✓ | × | ↑ | 1 | [24] | × | - | ✓ | × | ↑ | 1 | [24] | × | - | × | - | × | - | × | - |

|          |        |   |   |   |   |      |   |   |   |   |   |   |      |   |   |   |   |   |   |   |   |   |
|----------|--------|---|---|---|---|------|---|---|---|---|---|---|------|---|---|---|---|---|---|---|---|---|
| ACTA2    | P62736 | ✓ | × | ↑ | 1 | [24] | × | - | ✓ | × | ↑ | 1 | [24] | × | - | - | × | - | × | - | × | - |
| STAG1    | Q8WVM7 | ✓ | × | ↑ | 1 | [24] | × | - | ✓ | × | ↑ | 1 | [24] | × | - | - | × | - | × | - | × | - |
| PIGR     | P01833 | ✓ | × | ↑ | 1 | [24] | × | - | ✓ | × | ↑ | 1 | [24] | × | - | - | × | - | × | - | × | - |
| SAA1     | P0DJ18 | ✓ | × | ↑ | 1 | [24] | × | - | ✓ | × | ↑ | 1 | [24] | × | - | - | × | - | × | - | × | - |
| ASAP2    | O43150 | ✓ | × | ↑ | 1 | [24] | × | - | ✓ | × | ↑ | 1 | [24] | × | - | - | × | - | × | - | × | - |
| TICAM2   | Q86XR7 | ✓ | × | ↑ | 1 | [24] | × | - | ✓ | × | ↑ | 1 | [24] | × | - | - | × | - | × | - | × | - |
| HSPE1    | P61604 | ✓ | × | ↑ | 1 | [24] | × | - | ✓ | × | ↑ | 1 | [24] | × | - | - | × | - | × | - | × | - |
| TMPRSS13 | Q9BYE2 | ✓ | × | ↑ | 1 | [24] | × | - | ✓ | × | ↑ | 1 | [24] | × | - | - | × | - | × | - | × | - |
| ZKSCAN5  | Q9Y2L8 | ✓ | × | ↑ | 1 | [24] | × | - | ✓ | × | ↑ | 1 | [24] | × | - | - | × | - | × | - | × | - |
| ZNF627   | Q7L945 | ✓ | × | ↑ | 1 | [24] | × | - | ✓ | × | ↑ | 1 | [24] | × | - | - | × | - | × | - | × | - |
| ZYG11B   | Q9C0D3 | ✓ | × | ↑ | 1 | [24] | × | - | ✓ | × | ↑ | 1 | [24] | × | - | - | × | - | × | - | × | - |
| TENM3    | Q9P273 | ✓ | × | ↑ | 1 | [24] | × | - | ✓ | × | ↑ | 1 | [24] | × | - | - | × | - | × | - | × | - |
| PSG8     | Q9UQ74 | ✓ | × | ↑ | 1 | [24] | × | - | ✓ | × | ↑ | 1 | [24] | × | - | - | × | - | × | - | × | - |
| ODF2L    | Q9ULJ1 | ✓ | × | ↑ | 1 | [24] | × | - | ✓ | × | ↑ | 1 | [24] | × | - | - | × | - | × | - | × | - |
| KARCA1   | Q8NEP7 | ✓ | × | ↑ | 1 | [24] | × | - | ✓ | × | ↑ | 1 | [24] | × | - | - | × | - | × | - | × | - |
| KLHDC9   | Q8NEP7 | ✓ | × | ↑ | 1 | [24] | × | - | ✓ | × | ↑ | 1 | [24] | × | - | - | × | - | × | - | × | - |
| OPA1     | O60313 | ✓ | × | ↑ | 1 | [24] | × | - | ✓ | × | ↑ | 1 | [24] | × | - | - | × | - | × | - | × | - |
| BDNF     | P23560 | ✓ | × | ↓ | 1 | [24] | × | - | ✓ | × | ↓ | 1 | [24] | × | - | - | × | - | × | - | × | - |
| CGREF1   | Q99674 | ✓ | × | ↓ | 1 | [24] | × | - | ✓ | × | ↓ | 1 | [24] | × | - | - | × | - | × | - | × | - |
| PLXDC2   | Q6UX71 | ✓ | × | ↓ | 1 | [24] | × | - | ✓ | × | ↓ | 1 | [24] | × | - | - | × | - | × | - | × | - |
| LFNG     | Q8NES3 | ✓ | × | ↓ | 1 | [24] | × | - | ✓ | × | ↓ | 1 | [24] | × | - | - | × | - | × | - | × | - |
| EFCAB14  | O75071 | ✓ | × | ↓ | 1 | [24] | × | - | ✓ | × | ↓ | 1 | [24] | × | - | - | × | - | × | - | × | - |
| CAMK2B   | Q13554 | ✓ | × | ↓ | 1 | [24] | × | - | ✓ | × | ↓ | 1 | [24] | × | - | - | × | - | × | - | × | - |
| PRKCSH   | P14314 | ✓ | × | ↓ | 1 | [24] | × | - | ✓ | × | ↓ | 1 | [24] | × | - | - | × | - | × | - | × | - |
| GOLGB1   | Q14789 | ✓ | × | ↓ | 1 | [24] | × | - | ✓ | × | ↓ | 1 | [24] | × | - | - | × | - | × | - | × | - |

|           |        |              |              |              |       |     |     |     |
|-----------|--------|--------------|--------------|--------------|-------|-----|-----|-----|
| ENO2      | P09104 | ✓ × ↓ 1 [24] | × -          | ✓ × ↓ 1 [24] | × - - | × - | × - | × - |
| LCAT      | P04180 | ✓ × ↓ 1 [24] | × -          | ✓ × ↓ 1 [24] | × - - | × - | × - | × - |
| C2        | P06681 | ✓ × ↓ 1 [24] | × -          | ✓ × ↓ 1 [24] | × - - | × - | × - | × - |
| UACA      | Q9BZF9 | ✓ × ↓ 1 [24] | × -          | ✓ × ↓ 1 [24] | × - - | × - | × - | × - |
| SORCS3    | Q9UPU3 | ✓ × ↓ 1 [24] | × -          | ✓ × ↓ 1 [24] | × - - | × - | × - | × - |
| BMP15     | O95972 | ✓ × ↓ 1 [24] | × -          | ✓ × ↓ 1 [24] | × - - | × - | × - | × - |
| S1PR1     | P21453 | ✓ × ↓ 1 [24] | × -          | ✓ × ↓ 1 [24] | × - - | × - | × - | × - |
| IL17RC    | Q8NAC3 | ✓ × ↓ 1 [24] | × -          | ✓ × ↓ 1 [24] | × - - | × - | × - | × - |
| IRAK2     | O43187 | ✓ × ↓ 1 [24] | × -          | ✓ × ↓ 1 [24] | × - - | × - | × - | × - |
| KCNQ3     | O43525 | ✓ × ↓ 1 [24] | × -          | ✓ × ↓ 1 [24] | × - - | × - | × - | × - |
| NALCN     | Q8IZF0 | ✓ × ↓ 1 [24] | × -          | ✓ × ↓ 1 [24] | × - - | × - | × - | × - |
| TMC5      | Q6UXY8 | ✓ × ↓ 1 [24] | × -          | ✓ × ↓ 1 [24] | × - - | × - | × - | × - |
| TRMT2A    | Q8IZ69 | ✓ × ↓ 1 [24] | × -          | ✓ × ↓ 1 [24] | × - - | × - | × - | × - |
| GALNT16   | Q8N428 | ✓ × ↓ 1 [24] | × -          | ✓ × ↓ 1 [24] | × - - | × - | × - | × - |
| CYP1A1    | P04798 | ✓ × ↓ 1 [24] | × -          | ✓ × ↓ 1 [24] | × - - | × - | × - | × - |
| POLR1A    | O95602 | ✓ × ↓ 1 [24] | × -          | ✓ × ↓ 1 [24] | × - - | × - | × - | × - |
| INSR      | P06213 | ✓ × ↓ 1 [24] | × -          | ✓ × ↓ 1 [24] | × - - | × - | × - | × - |
| SRCAP     | Q6ZRS2 | ✓ × ↓ 1 [24] | × -          | ✓ × ↓ 1 [24] | × - - | × - | × - | × - |
| INHBA     | P08476 | ✓ × ↓ 1 [24] | × -          | ✓ × ↓ 1 [24] | × - - | × - | × - | × - |
| ADAM-TS16 | Q8TE57 | ✓ × ↓ 1 [24] | × -          | ✓ × ↓ 1 [24] | × - - | × - | × - | × - |
| IGHA1     | P01876 | ✓ × ↑ 1 [25] | ✓ × ↑ 1 [25] | × -          | × - - | × - | × - | × - |
| TIMP2     | P16035 | ✓ × ↑ 1 [25] | ✓ × ↑ 1 [25] | × -          | × - - | × - | × - | × - |
| HAPLN1    | P10915 | ✓ × ↓ 1 [25] | ✓ × ↓ 1 [25] | × -          | × - - | × - | × - | × - |
| ITM2C     | Q9NQX7 | ✓ × ↓ 1 [25] | ✓ × ↓ 1 [25] | × -          | × - - | × - | × - | × - |
| NMS       | Q5H8A3 | ✓ × ↓ 1 [25] | ✓ × ↓ 1 [25] | × -          | × - - | × - | × - | × - |

|                     |        |              |              |              |              |     |     |     |
|---------------------|--------|--------------|--------------|--------------|--------------|-----|-----|-----|
| NSG1                | P42857 | ✓ × ↓ 1 [25] | ✓ × ↓ 1 [25] | × -          | × - -        | × - | × - | × - |
| PNOC                | Q13519 | ✓ × ↓ 1 [25] | ✓ × ↓ 1 [25] | × -          | × - -        | × - | × - | × - |
| PENK                | P01210 | ✓ × ↓ 1 [25] | ✓ × ↓ 1 [25] | × -          | × - -        | × - | × - | × - |
| SLC24A2             | Q9UI40 | ✓ × ↓ 1 [25] | ✓ × ↓ 1 [25] | × -          | × - -        | × - | × - | × - |
| TAC3                | Q9UHF0 | ✓ × ↓ 1 [25] | ✓ × ↓ 1 [25] | × -          | × - -        | × - | × - | × - |
| SPOCK1              | Q08629 | ✓ × ↓ 1 [25] | ✓ × ↓ 1 [25] | × -          | × - -        | × - | × - | × - |
| MSLN                | Q13421 | ✓ × ↓ 1 [25] | ✓ × ↓ 1 [25] | × -          | × - -        | × - | × - | × - |
| B4GAT1              | O43505 | ✓ × ↓ 1 [25] | ✓ × ↓ 1 [25] | × -          | × - -        | × - | × - | × - |
| NTM                 | Q9P121 | ✓ × ↓ 1 [25] | ✓ × ↓ 1 [25] | × -          | × - -        | × - | × - | × - |
| C12orf49            | Q9H741 | ✓ × ↓ 1 [25] | ✓ × ↓ 1 [25] | × -          | × - -        | × - | × - | × - |
| LRG1                | P02750 | ✓ × ↑ 1 [27] | ✓ × ↑ 1 [27] | × -          | × - -        | × - | × - | × - |
| NEGR1               | Q7Z3B1 | ✓ × ↓ 1 [27] | ✓ × ↓ 1 [27] | × -          | ✓ × ↓ 1 [27] | × - | × - | × - |
| SERPINF1            | P36955 | ✓ × ↑ 1 [28] | ✓ × ↑ 1 [28] | × -          | × - -        | × - | × - | × - |
| ACTB                | P60709 | ✓ × ↑ 1 [28] | ✓ × ↑ 1 [28] | × -          | × - -        | × - | × - | × - |
| HDHD2               | Q9H0R4 | ✓ × ↑ 1 [29] | × -          | ✓ × ↑ 1 [29] | × - -        | × - | × - | × - |
| PTK7                | Q13308 | ✓ × ↑ 1 [29] | × -          | ✓ × ↑ 1 [29] | × - -        | × - | × - | × - |
| PBXIP1              | Q96AQ6 | ✓ × ↑ 1 [29] | × -          | ✓ × ↑ 1 [29] | × - -        | × - | × - | × - |
| C1QA                | P02745 | ✓ × ↑ 1 [29] | × -          | ✓ × ↑ 1 [29] | × - -        | × - | × - | × - |
| ST8SIA4             | Q92187 | ✓ × ↑ 1 [29] | × -          | ✓ × ↑ 1 [29] | × - -        | × - | × - | × - |
| THOP1               | P52888 | ✓ × ↑ 1 [29] | × -          | ✓ × ↑ 1 [29] | × - -        | × - | × - | × - |
| WARS                | P23381 | ✓ × ↑ 1 [29] | × -          | ✓ × ↑ 1 [29] | × - -        | × - | × - | × - |
| MFAP5               | Q13361 | ✓ × ↑ 1 [29] | × -          | ✓ × ↑ 1 [29] | × - -        | × - | × - | × - |
| TXNRD2              | Q9NNW7 | ✓ × ↑ 1 [29] | × -          | ✓ × ↑ 1 [29] | × - -        | × - | × - | × - |
| ISLR                | O14498 | ✓ × ↑ 1 [29] | × -          | ✓ × ↑ 1 [29] | × - -        | × - | × - | × - |
| TNFSF12-<br>TNFSF13 |        | ✓ × ↑ 1 [29] | × -          | ✓ × ↑ 1 [29] | × - -        | × - | × - | × - |



|         |        |   |   |   |   |      |   |   |   |   |   |   |      |   |   |   |   |   |   |   |   |
|---------|--------|---|---|---|---|------|---|---|---|---|---|---|------|---|---|---|---|---|---|---|---|
| PLAC9   | Q5JTB6 | ✓ | × | ↑ | 1 | [29] | × | - | ✓ | × | ↑ | 1 | [29] | × | - | × | - | × | - | × | - |
| SEZ6L   | Q9BYH1 | ✓ | × | ↑ | 1 | [29] | × | - | ✓ | × | ↑ | 1 | [29] | × | - | × | - | × | - | × | - |
| PDGFRL  | Q15198 | ✓ | × | ↑ | 1 | [29] | × | - | ✓ | × | ↑ | 1 | [29] | × | - | × | - | × | - | × | - |
| MERTK   | Q12866 | ✓ | × | ↑ | 1 | [29] | × | - | ✓ | × | ↑ | 1 | [29] | × | - | × | - | × | - | × | - |
| ELN     | P15502 | ✓ | × | ↑ | 1 | [29] | × | - | ✓ | × | ↑ | 1 | [29] | × | - | × | - | × | - | × | - |
| YWHAG   | P61981 | ✓ | × | ↑ | 1 | [29] | × | - | ✓ | × | ↑ | 1 | [29] | × | - | × | - | × | - | × | - |
| NEFL    | P07196 | ✓ | × | ↑ | 1 | [29] | × | - | ✓ | × | ↑ | 1 | [29] | × | - | × | - | × | - | × | - |
| CECR1   | Q9NZK5 | ✓ | × | ↑ | 1 | [29] | × | - | ✓ | × | ↑ | 1 | [29] | × | - | × | - | × | - | × | - |
| ATF6    | P18850 | ✓ | × | ↑ | 1 | [29] | × | - | ✓ | × | ↑ | 1 | [29] | × | - | × | - | × | - | × | - |
| CDH12   | P55289 | ✓ | × | ↑ | 1 | [29] | × | - | ✓ | × | ↑ | 1 | [29] | × | - | × | - | × | - | × | - |
| CNTFR   | P26992 | ✓ | × | ↑ | 1 | [29] | × | - | ✓ | × | ↑ | 1 | [29] | × | - | × | - | × | - | × | - |
| MAP2    | P11137 | ✓ | × | ↑ | 1 | [29] | × | - | ✓ | × | ↑ | 1 | [29] | × | - | × | - | × | - | × | - |
| CCL14   | Q16627 | ✓ | × | ↑ | 1 | [29] | × | - | ✓ | × | ↑ | 1 | [29] | × | - | × | - | × | - | × | - |
| SLITRK3 | O94933 | ✓ | × | ↑ | 1 | [29] | × | - | ✓ | × | ↑ | 1 | [29] | × | - | × | - | × | - | × | - |
| ITGAM   | P11215 | ✓ | × | ↑ | 1 | [29] | × | - | ✓ | × | ↑ | 1 | [29] | × | - | × | - | × | - | × | - |
| PRSS23  | O95084 | ✓ | × | ↑ | 1 | [29] | × | - | ✓ | × | ↑ | 1 | [29] | × | - | × | - | × | - | × | - |
| CDH3    | P22223 | ✓ | × | ↑ | 1 | [29] | × | - | ✓ | × | ↑ | 1 | [29] | × | - | × | - | × | - | × | - |
| PRAP1   | Q96NZ9 | ✓ | × | ↑ | 1 | [29] | × | - | ✓ | × | ↑ | 1 | [29] | × | - | × | - | × | - | × | - |
| PKDCC   | Q504Y2 | ✓ | × | ↑ | 1 | [29] | × | - | ✓ | × | ↑ | 1 | [29] | × | - | × | - | × | - | × | - |
| CREG1   | O75629 | ✓ | × | ↑ | 1 | [29] | × | - | ✓ | × | ↑ | 1 | [29] | × | - | × | - | × | - | × | - |
| HACD3   | Q9P035 | ✓ | × | ↑ | 1 | [29] | × | - | ✓ | × | ↑ | 1 | [29] | × | - | × | - | × | - | × | - |
| RTTN    | Q86VV8 | ✓ | × | ↑ | 1 | [29] | × | - | ✓ | × | ↑ | 1 | [29] | × | - | × | - | × | - | × | - |
| ARG1    | P05089 | ✓ | × | ↑ | 1 | [29] | × | - | ✓ | × | ↑ | 1 | [29] | × | - | × | - | × | - | × | - |
| PAM     | P19021 | ✓ | × | ↑ | 1 | [29] | × | - | ✓ | × | ↑ | 1 | [29] | × | - | × | - | × | - | × | - |
| CD74    | P04233 | ✓ | × | ↑ | 1 | [29] | × | - | ✓ | × | ↑ | 1 | [29] | × | - | × | - | × | - | × | - |

|                 |                   |   |   |   |   |      |   |   |   |   |   |   |      |   |   |   |   |   |   |   |   |
|-----------------|-------------------|---|---|---|---|------|---|---|---|---|---|---|------|---|---|---|---|---|---|---|---|
| SERPINB3        | P29508            | ✓ | × | ↑ | 1 | [29] | × | - | ✓ | × | ↑ | 1 | [29] | × | - | × | - | × | - | × | - |
| AGRN            | O00468            | ✓ | × | ↑ | 1 | [29] | × | - | ✓ | × | ↑ | 1 | [29] | × | - | × | - | × | - | × | - |
| NRXN2           | P58401#<br>Q9P2S2 | ✓ | × | ↕ | 1 | [29] | × | - | ✓ | × | ↕ | 1 | [29] | × | - | × | - | × | - | × | - |
| GFAP            | P14136            | ✓ | × | ↑ | 1 | [29] | × | - | ✓ | × | ↑ | 1 | [29] | × | - | × | - | × | - | × | - |
| SIRPB1          | O00241#<br>Q5TFQ8 | ✓ | × | ↑ | 1 | [29] | × | - | ✓ | × | ↑ | 1 | [29] | × | - | × | - | × | - | × | - |
| C1QTNF3         | Q9BXJ4            | ✓ | × | ↑ | 1 | [29] | × | - | ✓ | × | ↑ | 1 | [29] | × | - | × | - | × | - | × | - |
| SEMA4D          | Q92854            | ✓ | × | ↑ | 1 | [29] | × | - | ✓ | × | ↑ | 1 | [29] | × | - | × | - | × | - | × | - |
| GNB1            | P62873            | ✓ | × | ↑ | 1 | [29] | × | - | ✓ | × | ↑ | 1 | [29] | × | - | × | - | × | - | × | - |
| SECTM1          | Q8WVN6            | ✓ | × | ↑ | 1 | [29] | × | - | ✓ | × | ↑ | 1 | [29] | × | - | × | - | × | - | × | - |
| GKN1            | Q9NS71            | ✓ | × | ↑ | 1 | [29] | × | - | ✓ | × | ↑ | 1 | [29] | × | - | × | - | × | - | × | - |
| ST6GAL-<br>NAC5 | Q9BVH7            | ✓ | × | ↑ | 1 | [29] | × | - | ✓ | × | ↑ | 1 | [29] | × | - | × | - | × | - | × | - |
| LCE3D           | Q9BYE3            | ✓ | × | ↑ | 1 | [29] | × | - | ✓ | × | ↑ | 1 | [29] | × | - | × | - | × | - | × | - |
| S100A7          | P31151            | ✓ | × | ↑ | 1 | [29] | × | - | ✓ | × | ↑ | 1 | [29] | × | - | × | - | × | - | × | - |
| B3GAT2          | Q9NPZ5            | ✓ | × | ↑ | 1 | [29] | × | - | ✓ | × | ↑ | 1 | [29] | × | - | × | - | × | - | × | - |
| SYNJ1           | O43426            | ✓ | × | ↑ | 1 | [29] | × | - | ✓ | × | ↑ | 1 | [29] | × | - | × | - | × | - | × | - |
| COL2A1          | P02458            | ✓ | × | ↑ | 1 | [29] | × | - | ✓ | × | ↑ | 1 | [29] | × | - | × | - | × | - | × | - |
| DEFA3           | P59666            | ✓ | × | ↓ | 1 | [29] | × | - | ✓ | × | ↓ | 1 | [29] | × | - | × | - | × | - | × | - |
| HRNR            | Q86YZ3            | ✓ | × | ↓ | 1 | [29] | × | - | ✓ | × | ↓ | 1 | [29] | × | - | × | - | × | - | × | - |
| NDRG1           | Q92597            | ✓ | × | ↓ | 1 | [29] | × | - | ✓ | × | ↓ | 1 | [29] | × | - | × | - | × | - | × | - |
| DEFA1           | P59665            | ✓ | × | ↓ | 1 | [29] | × | - | ✓ | × | ↓ | 1 | [29] | × | - | × | - | × | - | × | - |
| PRSS1           | P07477            | ✓ | × | ↓ | 1 | [29] | × | - | ✓ | × | ↓ | 1 | [29] | × | - | × | - | × | - | × | - |
| LDLRAD3         | Q86YD5            | ✓ | × | ↓ | 1 | [29] | × | - | ✓ | × | ↓ | 1 | [29] | × | - | × | - | × | - | × | - |
| MCFD2           | Q8NI22            | ✓ | × | ↓ | 1 | [29] | × | - | ✓ | × | ↓ | 1 | [29] | × | - | × | - | × | - | × | - |
| PTPRD           | P23468            | ✓ | × | ↓ | 1 | [29] | × | - | ✓ | × | ↓ | 1 | [29] | × | - | × | - | × | - | × | - |
| IGF1R           | P08069            | ✓ | × | ↓ | 1 | [29] | × | - | ✓ | × | ↓ | 1 | [29] | × | - | × | - | × | - | × | - |

|            |        |   |   |   |   |      |   |   |   |   |   |   |      |   |   |   |   |   |   |   |   |
|------------|--------|---|---|---|---|------|---|---|---|---|---|---|------|---|---|---|---|---|---|---|---|
| MT1H       | P80294 | ✓ | × | ↓ | 1 | [29] | × | - | ✓ | × | ↓ | 1 | [29] | × | - | × | - | × | - | × | - |
| ADGRA3     | Q8IWK6 | ✓ | × | ↓ | 1 | [29] | × | - | ✓ | × | ↓ | 1 | [29] | × | - | × | - | × | - | × | - |
| CD300LF    | Q8TDQ1 | ✓ | × | ↓ | 1 | [29] | × | - | ✓ | × | ↓ | 1 | [29] | × | - | × | - | × | - | × | - |
| VEGFC      | P49767 | ✓ | × | ↓ | 1 | [29] | × | - | ✓ | × | ↓ | 1 | [29] | × | - | × | - | × | - | × | - |
| TIMP4      | Q99727 | ✓ | × | ↓ | 1 | [29] | × | - | ✓ | × | ↓ | 1 | [29] | × | - | × | - | × | - | × | - |
| COX6B1     | P14854 | ✓ | × | ↓ | 1 | [29] | × | - | ✓ | × | ↓ | 1 | [29] | × | - | × | - | × | - | × | - |
| EFEMP1     | Q12805 | ✓ | × | ↓ | 1 | [29] | × | - | ✓ | × | ↓ | 1 | [29] | × | - | × | - | × | - | × | - |
| REG1A      | P05451 | ✓ | × | ↓ | 1 | [29] | × | - | ✓ | × | ↓ | 1 | [29] | × | - | × | - | × | - | × | - |
| EFEMP2     | O95967 | ✓ | × | ↓ | 1 | [29] | × | - | ✓ | × | ↓ | 1 | [29] | × | - | × | - | × | - | × | - |
| MANF       | P55145 | ✓ | × | ↓ | 1 | [29] | × | - | ✓ | × | ↓ | 1 | [29] | × | - | × | - | × | - | × | - |
| ATP6V1E1   | P36543 | ✓ | × | ↓ | 1 | [29] | × | - | ✓ | × | ↓ | 1 | [29] | × | - | × | - | × | - | × | - |
| FAM3A      | P98173 | ✓ | × | ↓ | 1 | [29] | × | - | ✓ | × | ↓ | 1 | [29] | × | - | × | - | × | - | × | - |
| ATP5A1     | P25705 | ✓ | × | ↓ | 1 | [29] | × | - | ✓ | × | ↓ | 1 | [29] | × | - | × | - | × | - | × | - |
| CPS1       | P31327 | ✓ | × | ↓ | 1 | [29] | × | - | ✓ | × | ↓ | 1 | [29] | × | - | × | - | × | - | × | - |
| TMEM108    | Q6UXF1 | ✓ | × | ↓ | 1 | [29] | × | - | ✓ | × | ↓ | 1 | [29] | × | - | × | - | × | - | × | - |
| CNTNAP3    | Q9BZ76 | ✓ | × | ↓ | 1 | [29] | × | - | ✓ | × | ↓ | 1 | [29] | × | - | × | - | × | - | × | - |
| C1GAL-T1C1 | Q96EU7 | ✓ | × | ↓ | 1 | [29] | × | - | ✓ | × | ↓ | 1 | [29] | × | - | × | - | × | - | × | - |
| SYCP2L     | Q5T4T6 | ✓ | × | ↓ | 1 | [29] | × | - | ✓ | × | ↓ | 1 | [29] | × | - | × | - | × | - | × | - |
| CALD1      | Q05682 | ✓ | × | ↓ | 1 | [29] | × | - | ✓ | × | ↓ | 1 | [29] | × | - | × | - | × | - | × | - |
| VIP        | P01282 | ✓ | × | ↓ | 1 | [29] | × | - | ✓ | × | ↓ | 1 | [29] | × | - | × | - | × | - | × | - |
| CARTPT     | Q16568 | ✓ | × | ↓ | 1 | [29] | × | - | ✓ | × | ↓ | 1 | [29] | × | - | × | - | × | - | × | - |
| ARPP21     | Q9UBL0 | ✓ | × | ↓ | 1 | [29] | × | - | ✓ | × | ↓ | 1 | [29] | × | - | × | - | × | - | × | - |
| CPPED1     | Q9BRF8 | ✓ | × | ↓ | 1 | [29] | × | - | ✓ | × | ↓ | 1 | [29] | × | - | × | - | × | - | × | - |
| WFDC1      | Q9HC57 | ✓ | × | ↓ | 1 | [29] | × | - | ✓ | × | ↓ | 1 | [29] | × | - | × | - | × | - | × | - |
| FAM19A1    | Q7Z5A9 | ✓ | × | ↓ | 1 | [29] | × | - | ✓ | × | ↓ | 1 | [29] | × | - | × | - | × | - | × | - |

|          |        |              |   |   |              |   |   |                |             |             |   |             |   |
|----------|--------|--------------|---|---|--------------|---|---|----------------|-------------|-------------|---|-------------|---|
| SEL1L    | Q9UBV2 | ✓ × ↓ 1 [29] | × | - | ✓ × ↓ 1 [29] | × | - | ×              | -           | ×           | - | ×           | - |
| SLPI     | P03973 | ✓ × ↓ 1 [29] | × | - | ✓ × ↓ 1 [29] | × | - | ×              | -           | ×           | - | ×           | - |
| LDLR     | P01130 | ✓ × ↓ 1 [29] | × | - | ✓ × ↓ 1 [29] | × | - | ×              | -           | ×           | - | ×           | - |
| DSTN     | P60981 | ✓ × ↓ 1 [29] | × | - | ✓ × ↓ 1 [29] | × | - | ×              | -           | ×           | - | ×           | - |
| KRT9     | P35527 | ✓ × ↓ 1 [29] | × | - | ✓ × ↓ 1 [29] | × | - | ×              | -           | ×           | - | ×           | - |
| PTPRS    | Q13332 | ✓ × ↓ 1 [29] | × | - | ✓ × ↓ 1 [29] | × | - | ×              | -           | ×           | - | ×           | - |
| PDAP1    | Q13442 | ✓ × ↓ 1 [29] | × | - | ✓ × ↓ 1 [29] | × | - | ×              | -           | ×           | - | ×           | - |
| MPZ      | P25189 | ✓ × ↓ 1 [29] | × | - | ✓ × ↓ 1 [29] | × | - | ×              | -           | ×           | - | ×           | - |
| CPLX1    | O14810 | ✓ × ↓ 1 [29] | × | - | ✓ × ↓ 1 [29] | × | - | ×              | -           | ×           | - | ×           | - |
| KREMEN1  | Q96MU8 | ✓ × ↓ 1 [29] | × | - | ✓ × ↓ 1 [29] | × | - | ×              | -           | ×           | - | ×           | - |
| B4GALT2  | O60909 | ✓ × ↓ 1 [29] | × | - | ✓ × ↓ 1 [29] | × | - | ×              | -           | ×           | - | ×           | - |
| SHISA9   | B4DS77 | ✓ × ↓ 1 [29] | × | - | ✓ × ↓ 1 [29] | × | - | ×              | -           | ×           | - | ×           | - |
| C1orf21  | Q9H246 | ✓ × ↓ 1 [29] | × | - | ✓ × ↓ 1 [29] | × | - | ×              | -           | ×           | - | ×           | - |
| GPR37L1  | O60883 | ✓ × ↓ 1 [29] | × | - | ✓ × ↓ 1 [29] | × | - | ×              | -           | ×           | - | ×           | - |
| RPH3A    | Q9Y2J0 | ✓ × ↓ 1 [29] | × | - | ✓ × ↓ 1 [29] | × | - | ×              | -           | ×           | - | ×           | - |
| GAS1     | P54826 | ✓ × ↓ 1 [29] | × | - | ✓ × ↓ 1 [29] | × | - | ×              | -           | ×           | - | ×           | - |
| SERPINB6 | P35237 | ✓ × ↓ 1 [29] | × | - | ✓ × ↓ 1 [29] | × | - | ×              | -           | ×           | - | ×           | - |
| CD320    | Q9NPF0 | ✓ × ↓ 1 [29] | × | - | ✓ × ↓ 1 [29] | × | - | ×              | -           | ×           | - | ×           | - |
| IL1RAP   | Q9NPH3 | ✓ × ↓ 1 [29] | × | - | ✓ × ↓ 1 [29] | × | - | ×              | -           | ×           | - | ×           | - |
| ACVR2A   | P27037 | ✓ × ↓ 1 [29] | × | - | ✓ × ↓ 1 [29] | × | - | ×              | -           | ×           | - | ×           | - |
| TGOLN2   | O43493 | ✓ × ↓ 1 [29] | × | - | ✓ × ↓ 1 [29] | × | - | ×              | -           | ×           | - | ×           | - |
| SEC62    | Q99442 | ✓ × ↓ 1 [29] | × | - | ✓ × ↓ 1 [29] | × | - | ×              | -           | ×           | - | ×           | - |
| LPA      | P08519 | ×            | - | × | -            | × | - | ×              | -           | ×           | - | ✓ × ↑ 1 [1] |   |
| CD40     | P25942 | ×            | - | × | -            | × | - | ✓ ✓ ↑ 2 [4 10] | ✓ × ↑ 1 [4] | ✓ × ↓ 1 [1] |   |             |   |
| CXCL2    | P19875 | ×            | - | × | -            | × | - | ✓ × ↑ 1 [3]    | ✓ × ↑ 1 [3] | ×           | - |             |   |

|         |        |   |   |   |   |   |   |              |   |                |             |   |   |
|---------|--------|---|---|---|---|---|---|--------------|---|----------------|-------------|---|---|
| CKB     | P12277 | × | - | × | - | × | - | ×            | - | ✓ × ↓ 1 [3]    | ✓ × ↓ 1 [3] | × | - |
| F3      | P13726 | × | - | × | - | × | - | ×            | - | ✓ ✓ ↑ 2 [4 10] | ✓ × ↑ 1 [4] | × | - |
| ACE     | P12821 | × | - | × | - | × | - | ×            | - | ✓ × ↑ 1 [4]    | ✓ × ↑ 1 [4] | × | - |
| MMP3    | P08254 | × | - | × | - | × | - | ×            | - | ✓ × ↑ 1 [4]    | ✓ × ↑ 1 [4] | × | - |
| ANGPT2  | O15123 | × | - | × | - | × | - | ×            | - | ✓ ✓ ↑ 2 [4 10] | ✓ × ↑ 1 [4] | × | - |
| TGFA    | P01135 | × | - | × | - | × | - | ×            | - | ✓ ✓ ↑ 2 [4 10] | ✓ × ↑ 1 [4] | × | - |
| KITLG   | P21583 | × | - | × | - | × | - | ×            | - | ✓ ✓ ↑ 2 [4 10] | ✓ × ↑ 1 [4] | × | - |
| FTH1    | P02794 | × | - | × | - | × | - | ×            | - | ✓ ✓ ↑ 2 [4 10] | ✓ × ↑ 1 [4] | × | - |
| AXL     | P30530 | × | - | × | - | × | - | ×            | - | ✓ × ⇅ 2 [4 10] | ✓ × ↓ 1 [4] | × | - |
| VWF     | P04275 | × | - | × | - | × | - | ×            | - | ✓ × ↓ 1 [4]    | ✓ × ↓ 1 [4] | × | - |
| VCAM1   | P19320 | × | - | × | - | × | - | ×            | - | ✓ × ↓ 1 [4]    | ✓ × ↓ 1 [4] | × | - |
| IL6R    | P08887 | × | - | × | - | × | - | ×            | - | ×              | ✓ × ↑ 1 [4] | × | - |
| TFF3    | Q07654 | × | - | × | - | × | - | ×            | - | ×              | ✓ × ↓ 1 [4] | × | - |
| FGF4    | P08620 | × | - | × | - | × | - | ✓ × ↑ 1 [13] |   | ×              | ✓ × ↓ 1 [4] | × | - |
| CD40LG  | P29965 | × | - | × | - | × | - | ×            | - | ✓ × ↑ 1 [10]   | ×           | × | - |
| CCL11   | P51671 | × | - | × | - | × | - | ×            | - | ✓ × ↑ 1 [10]   | ×           | × | - |
| FGF2    | P09038 | × | - | × | - | × | - | ×            | - | ✓ × ↑ 1 [10]   | ×           | × | - |
| IGF2BP2 | Q9Y6M1 | × | - | × | - | × | - | ×            | - | ✓ × ↑ 1 [10]   | ×           | × | - |
| IL1RN   | P18510 | × | - | × | - | × | - | ×            | - | ✓ × ↑ 1 [10]   | ×           | × | - |
| CXCL8   | P10145 | × | - | × | - | × | - | ×            | - | ✓ × ↑ 1 [10]   | ×           | × | - |
| CCL2    | P13500 | × | - | × | - | × | - | ×            | - | ✓ × ↑ 1 [10]   | ×           | × | - |
| CCL22   | O00626 | × | - | × | - | × | - | ×            | - | ✓ × ↑ 1 [10]   | ×           | × | - |
| CCL3    | P10147 | × | - | × | - | × | - | ×            | - | ✓ × ↑ 1 [10]   | ×           | × | - |
| PAPPA   | Q13219 | × | - | × | - | × | - | ×            | - | ✓ × ↑ 1 [10]   | ×           | × | - |
| CCL18   | P55774 | × | - | × | - | × | - | ×            | - | ✓ × ↑ 1 [10]   | ×           | × | - |

|         |        |   |   |   |   |   |   |   |   |              |              |              |              |   |
|---------|--------|---|---|---|---|---|---|---|---|--------------|--------------|--------------|--------------|---|
| APCS    | P02743 | × | - | × | - | × | - | × | - | ✓ × ↑ 1 [10] | ×            | -            | ×            | - |
| AGER    | Q15109 | × | - | × | - | × | - | × | - | ✓ × ↑ 1 [10] | ×            | -            | ×            | - |
| TAGLN3  | Q9UI15 | × | - | × | - | × | - | × | - | ✓ × ↑ 1 [12] | ✓ × ↑ 1 [12] |              | ×            | - |
| TMSB10  | P63313 | × | - | × | - | × | - | × | - | ✓ × ↑ 1 [12] | ✓ × ↑ 1 [12] |              | ×            | - |
| SORCS1  | Q8WY21 | × | - | × | - | × | - | × | - | ✓ × ↑ 1 [12] | ✓ × ↑ 1 [12] |              | ×            | - |
| STMN1   | P16949 | × | - | × | - | × | - | × | - | ✓ × ↑ 1 [12] | ✓ × ↑ 1 [12] |              | ×            | - |
| FOLR2   | P14207 | × | - | × | - | × | - | × | - | ✓ × ↑ 1 [12] | ✓ × ↑ 1 [12] |              | ×            | - |
| PRRT2   | Q7Z6L0 | × | - | × | - | × | - | × | - | ✓ × ↑ 1 [12] | ✓ × ↑ 1 [12] |              | ×            | - |
| DYNLL2  | Q96FJ2 | × | - | × | - | × | - | × | - | ✓ × ↑ 1 [12] | ✓ × ↑ 1 [12] |              | ×            | - |
| SNCG    | O76070 | × | - | × | - | × | - | × | - | ✓ × ↑ 1 [12] | ✓ × ↑ 1 [12] |              | ×            | - |
| ATP1A2  | P50993 | × | - | × | - | × | - | × | - | ✓ × ↑ 1 [12] | ✓ × ↑ 1 [12] |              | ×            | - |
| UBB     | P0CG47 | × | - | × | - | × | - | × | - | ✓ × ↑ 1 [12] | ✓ × ↑ 1 [12] |              | ×            | - |
| PALM    | O75781 | × | - | × | - | × | - | × | - | ✓ × ↑ 1 [12] | ✓ × ↑ 1 [12] |              | ×            | - |
| MARCKS  | P29966 | × | - | × | - | × | - | × | - | ✓ × ↑ 1 [12] | ×            | -            | ×            | - |
| HSPA8   | P11142 | × | - | × | - | × | - | × | - | ✓ × ↑ 1 [12] | ✓ × ↑ 1 [12] |              | ×            | - |
| HTRA1   | Q92743 | × | - | × | - | × | - | × | - | ✓ × ↑ 1 [12] | ✓ × ↑ 1 [12] |              | ×            | - |
| ATP1A3  | P13637 | × | - | × | - | × | - | × | - | ✓ × ↑ 1 [12] | ✓ × ↑ 1 [12] |              | ×            | - |
| ISLR2   | Q6UXK2 | × | - | × | - | × | - | × | - | ✓ × ↑ 1 [12] | ×            | -            | ×            | - |
| PITHD1  | Q9GZP4 | × | - | × | - | × | - | × | - | ✓ × ↑ 1 [12] | ✓ × ↑ 1 [12] |              | ×            | - |
| TXN     | P10599 | × | - | × | - | × | - | × | - | ✓ × ↑ 1 [12] | ×            | -            | ×            | - |
| TMED4   | Q7Z7H5 | × | - | × | - | × | - | × | - | ✓ × ↑ 1 [12] | ×            | -            | ×            | - |
| CYCS    | P99999 | × | - | × | - | × | - | × | - | ✓ × ↑ 1 [12] | ×            | -            | ×            | - |
| SLITRK1 | Q96PX8 | × | - | × | - | × | - | × | - | ×            | -            | ✓ × ↑ 1 [12] | ×            | - |
| CNR1    | P21554 | × | - | × | - | × | - | × | - | ×            | -            | ×            | ✓ × ↑ 1 [12] |   |
| CMGA    | P10645 | × | - | × | - | × | - | × | - | ✓ × ↑ 1 [17] | ✓ × ↑ 1 [17] |              | ×            | - |

|      |        |   |   |   |   |   |   |              |   |   |   |   |   |   |
|------|--------|---|---|---|---|---|---|--------------|---|---|---|---|---|---|
| DKK3 | Q9UBP4 | × | - | × | - | × | - | ✓ × ↓ 1 [27] | × | - | × | - | × | - |
|------|--------|---|---|---|---|---|---|--------------|---|---|---|---|---|---|

In analysis, indicates that protein was reported by at least one study for the comparison in question.  
 #, Primary UniProt identifier (used for pathway analyses if applicable, see also Supplementary table 2); ↑, (consistently) increased; ↓, (consistently) decreased; ⇕, inconsistent reports of in- and decreased levels in different studies; Ref., references.

|    |                                   |    |                                   |    |                               |
|----|-----------------------------------|----|-----------------------------------|----|-------------------------------|
| 1  | Leung, Y, et al. (2015)           | 11 | Jahn, H., et al. (2011)           | 21 | Heywood, W. E., et al. (2015) |
| 2  | Perrin, R. J., et al. (2011)      | 12 | Dayon et al. (2018)               | 22 | Davidsson, P., et al. (2002)  |
| 3  | Craig-Schapiro, R., et al. (2011) | 13 | Lehallier, B., et al. (2016)      | 23 | Brinkmalm et al. (2018)       |
| 4  | Khan, W., et al. (2015)           | 14 | Hendrickson, R. C., et al. (2015) | 24 | Abdi, F., et al. (2006)       |
| 5  | Spellman, D. S., et al. (2015)    | 15 | Zhang et al. (2005)               | 25 | Hölttä, M., et al. (2015)     |
| 6  | Khoonsari et al. (2019)           | 16 | Lee, J. W., et al. (2007)         | 26 | Puchades, M., et al. (2003)   |
| 7  | Simonsen, A. H., et al. (2008).   | 17 | Wildsmith, K. R., et al. (2014)   | 27 | Wang et al. (2016)            |
| 8  | Paterson, R. W., et al. (2016)    | 18 | Finehout, E. J., et al. (2007)    | 28 | Yin, G. N., et al. (2009)     |
| 9  | Simonsen, A. H., et al. (2007)    | 19 | Oláh et al. (2015)                | 29 | Sathe et al. (2018)           |
| 10 | Hu, W. T., et al. (2010)          | 20 | Barucker et al.(2015)             |    |                               |
